# Supplementary material for: Systems Pharmacology-Based Approach to Comparatively Study the Independent and Synergistic Mechanisms of Danhong Injection and Naoxintong Capsule in Ischemic Stroke Treatment
Source: Evid Based Complement Alternat Med. 2019 Feb 4;2019:1056708. doi: 10.1155/2019/1056708 (PMC6378776; doi:10.1155/2019/1056708)
Supplement: Supplementary Materials — Table S1: the detailed information of all compounds in DHI and NXT. Table S2: the detailed information of DHI-ingredient targets, NXT-ingredient targets, and IS targets. [file 1056708.f1.xlsx]

## Sheet: Table S1
Table S1. The detailed information of all compounds in DHI and NXT.
No.	Source	Compound	Formula	InChI Key	CAS	MW	MLogP	nHDon	nHAcc	OB (%)	Caco-2	DL
1	DHI	Proline	C5H9NO2	ONIBWKKTOPOVIA-BYPYZUCNSA-N	147-85-3	115.15	-0.06	2	3	77.57	0.22	0.01
2	DHI	L-Pyroglutamic acid	C5H7NO3	ODHCTXKNWHHXJC-VKHMYHEASA-N	98-79-3	129.13	-0.67	2	4	96.25	-0.2	0.02
3	DHI	Uridine	C9H12N2O6	DRTQHJPVMGBUCF-YDLFOAGRSA-N	26287-69-4	244.23	-2.45	4	8	23.4	-1.07	0.11
4	DHI	Adenosine	C10H13N5O4	OIRDTQYFTABQOQ-KQYNXXCUSA-N	30143-02-3	267.28	-2.02	5	8	15.98	-1.56	0.18
5	DHI	IsoLeucine	C6H13NO2	AGPKZVBTJJNPAG-WHFBIAKZSA-N	73-32-5	131.2	0.7	3	3	59.05	0.06	0.02
6	DHI	Succinic acid	C4H6O4	KDYFGRWQOYBRFD-UHFFFAOYSA-N	110-15-6	118.1	-0.41	2	4	29.62	-0.44	0.01
7	DHI	Leucine	C6H13NO2	ROHFNLRQFUQHCH-YFKPBYRVSA-N	61-90-5	131.2	0.63	3	3	72.92	-0.05	0.01
8	DHI	Guanosine	C10H13N5O5	NYHBQMYGNKIUIF-BDXYJKHTSA-N	118-00-3	283.28	-2.41	6	9	21.43	-1.21	0.21
9	DHI	p-Hydroxybenzoic acid-O-glucoside	C13H16O8	XSSDYIMYZONMBL-TWEVDUBQSA-N	N/A	300.29	-0.74	5	8	42.9	-1.22	0.2
10	DHI	5-Hydroxymethylfurfural	C6H6O3	NOEGNKMFWQHSLB-UHFFFAOYSA-N	67-47-0	126.12	0.67	1	3	45.07	0.05	0.02
11	DHI	3,5-Dihydroxybenzonic acid/isomer	C7H6O4	UYEMGAFJOZZIFP-UHFFFAOYSA-N	99-10-5	154.13	0.9	3	4	69.34	0.01	0.03
12	DHI	Phenylalanine	C9H11NO2	COLNVLDHVKWLRT-QMMMGPOBSA-N	63-91-2	165.21	0.96	3	3	41.62	0.36	0.04
13	DHI	2-Hydroxy-3',4'-dihydroxyacetophenone	C8H8O4	LNZSKFZHPHBUDI-UHFFFAOYSA-N	29477-54-1	168.16	0.58	3	4	56.79	-0.12	0.04
14	DHI	Danshensu	C9H10O5	PAFLSMZLRSPALU-MRVPVSSYSA-N	76822-21-4	198.19	0.71	4	5	36.91	-0.27	0.06
15	DHI	Protocatechuic acid	C7H6O4	YQUVCSBJEUQKSH-UHFFFAOYSA-N	99-50-3	154.13	0.9	3	4	25.37	0.1	0.04
16	DHI	Danshensu methyl ester	C10H12O5	NMAOZVAEJYOPOF-SECBINFHSA-N	N/A	N/A	N/A	N/A	N/A	N/A	N/A	N/A
17	DHI	Neochlorogenic acid	C16H18O9	CWVRJTMFETXNAD-NXLLHMKUSA-N	906-33-2	354.34	-0.42	6	9	18.05	-1.37	0.33
18	DHI	4-(2-Carboxyethenyl)-2-(3, 4-dihydroxyphenyl)-2,3-dihydro-7-hydroxy-3-methylester, [2α, 3β, 4(E)-3-benzofurancarboxylic acid	C16H20O10	N/A	N/A	N/A	N/A	N/A	N/A	N/A	N/A	N/A
19	DHI	3,4-Dihydroxy benzenepropionic acid	C9H10O4	N/A	N/A	N/A	N/A	N/A	N/A	N/A	N/A	N/A
20	DHI	Ixoroside	C17H26O11	N/A	N/A	N/A	N/A	N/A	N/A	N/A	N/A	N/A
21	DHI	Dihydrocaffeic acid	C9H10O4	DZAUWHJDUNRCTF-UHFFFAOYSA-N	71693-95-3	182.19	1.39	3	4	32.79	0.25	0.05
22	DHI	Protocatechuic aldehyde	C7H6O3	IBGBGRVKPALMCQ-UHFFFAOYSA-N	139-85-5	138.13	1.06	2	3	38.35	0.43	0.03
23	DHI	Przewalskinic acid A/isomer	C18H14O8	GJHXGOBGPWPCCK-ZZXKWVIFSA-N	N/A	N/A	N/A	N/A	N/A	N/A	N/A	N/A
24	DHI	Isopropylmalic acid	C7H12O5	BITYXLXUCSKTJS-UHFFFAOYSA-N	3237-44-3	N/A	N/A	N/A	N/A	N/A	N/A	N/A
25	DHI	Caffeic acid-O-hexoside	C15H18O9	QOPSZFXPZWQLOG-UHFFFAOYSA-N	N/A	N/A	N/A	N/A	N/A	N/A	N/A	N/A
26	DHI	Syringin	C17H24O9	QJVXKWHHAMZTBY-GCPOEHJPSA-N	118-34-3	372.41	-0.51	5	9	14.64	-1.01	0.32
27	DHI	Chlorogenic acid	C16H18O9	CWVRJTMFETXNAD-JUHZACGLSA-N	202650-88-2	354.34	-0.42	6	9	11.93	-1.03	0.33
28	DHI	Coumaric acid-O-hexoside	C15H18O8	LJFYQZQUAULRDF-UHFFFAOYSA-N	117405-49-9	N/A	N/A	N/A	N/A	N/A	N/A	N/A
29	DHI	6-Hydroxykaempferol-di-O-glucoside	C27H30O17	NLQCYMKXVFANAM-AVHDRVKWSA-N	N/A	N/A	N/A	N/A	N/A	N/A	N/A	N/A
30	DHI	6-Hydrokaempferol-di-O-glucoside	C27H30O17	N/A	N/A	N/A	N/A	N/A	N/A	N/A	N/A	N/A
31	DHI	Hydroxysafflor yellow A	C27H32O16	IAVUBSCVWHLRGE-UXEKTNMQSA-N	78281-02-4	612.59	-4.45	12	16	3.53	-3.03	0.68
32	DHI	Cryptochlorogenic acid	C16H18O9	GYFFKZTYYAFCTR-AVXJPILUSA-N	905-99-7	354.34	-0.42	6	9	24.5	-1.43	0.33
33	DHI	Ferulic acid	C10H10O4	KSEBMYQBYZTDHS-HWKANZROSA-N	537-98-4	194.2	1.62	2	4	39.56	0.47	0.06
34	DHI	Caffeic acid	C9H8O4	QAIPRVGONGVQAS-DUXPYHPUSA-N	501-16-6	180.17	1.37	3	4	25.76	0.21	0.05
35	DHI	Roseoside	C19H30O8	SWYRVCGNMNAFEK-MHXFFUGFSA-N	54835-70-0	386.49	-0.5	5	8	10.81	-1.25	0.36
36	DHI	Sweroside	C16H22O9	VSJGJMKGNMDJCI-ZASXJUAOSA-N	14215-86-2	358.38	-1.59	4	9	4.96	-1.08	0.38
37	DHI	Morroniside	C17H26O11	YTZSBJLNMIQROD-KKORFXOPSA-N	25406-64-8	406.43	-2.47	5	11	13.86	-2.01	0.5
38	DHI	Prolithospermic acid	C18H14O8	N/A	N/A	N/A	N/A	N/A	N/A	N/A	N/A	N/A
39	DHI	Carthamidin-di-O-glucoside	C20H36O21	N/A	N/A	N/A	N/A	N/A	N/A	N/A	N/A	N/A
40	DHI	p-Coumaric acid	C9H8O3	NGSWKAQJJWESNS-ZZXKWVIFSA-N	7400-08-0	164.17	1.64	2	3	43.29	0.46	0.04
41	DHI	(2S,3S)-1-Phenyl-2,3-butanediol-3-O-D-glucopyranoside	C16H24O7	VXCHCEMGVYEDHV-FGOXOWFVSA-N	N/A	N/A	N/A	N/A	N/A	N/A	N/A	N/A
42	DHI	Eriocitrin	C27H32O15	OMQADRGFMLGFJF-MNPJBKLOSA-N	13463-28-0	596.59	-0.73	9	15	4.52	-2.23	0.7
43	DHI	Rutin	C27H30O16	IKGXIBQEEMLURG-NVPNHPEKSA-N	153-18-4	610.57	-1.45	10	16	3.2	-1.93	0.68
44	DHI	Salvianolic acid I	C27H22O12	MZSGWZGPESCJAN-JKXXRSRDSA-N	153765-45-8	N/A	N/A	N/A	N/A	N/A	N/A	N/A
45	DHI	Salvianolic acid J	C27H22O12	KPKHMGUZUPELJC-OEKAYNNHSA-N	N/A	538.49	3.78	6	12	43.38	-0.82	0.72
46	DHI	Salviaflaside	C24H26O13	DSMWJDJWYGMEBO-PRFRQLEPSA-N	178895-25-5	N/A	N/A	N/A	N/A	N/A	N/A	N/A
47	DHI	Kaempferol-3-O-rutinoside	C27H30O15	RTATXGUCZHCSNG-QHWHWDPRSA-N	17650-84-9	594.57	-1.18	9	15	3.64	-1.77	0.73
48	DHI	Safflor yellow A	C27H30O15	CHYLAEHATFZYSW-ZZXKWVIFSA-N	85532-77-0	594.57	-4.03	10	15	22.75	-2.52	0.75
49	DHI	Salvianolic acid D	C20H18O10	KFCMFABBVSIHTB-WUTVXBCWSA-N	142998-47-8	418.38	2.33	6	10	1.57	-0.78	0.5
50	DHI	Salvianolic acid G	C18H12O7	AMPDZVASNOBSQZ-SNVBAGLBSA-N	N/A	340.3	2.2	4	7	45.56	-0.14	0.61
51	DHI	Salvianolic acid F	C17H14O6	PULWRMOKQNWQBD-LZSLGQGWSA-N	N/A	N/A	N/A	N/A	N/A	N/A	N/A	N/A
52	DHI	Salvianolic acid E	C36H30O16	SOXUSBQFIOBYJU-DDPMSQIOSA-N	N/A	718.66	5.02	10	16	3.01	-1.52	0.39
53	DHI	Rosmarinic acid	C18H16O8	DOUMFZQKYFQNTF-WUTVXBCWSA-N	20283-92-5	360.34	2.69	5	8	1.38	-0.54	0.35
54	DHI	Isomer of Salvianolic acid A	C26H22O10	N/A	N/A	N/A	N/A	N/A	N/A	N/A	N/A	N/A
55	DHI	Lithospermic acid	C27H22O12	UJZQBMQZMKFSRV-RGKBJLTCSA-N	28831-65-4	538.49	3.38	7	12	2.67	-1.07	0.76
56	DHI	9''-Methyl lithospermate B	C37H32O16	HBYGJMZNCIGGFN-YXWUEXTASA-N	N/A	732.69	4.95	8	16	3.01	-1.01	0.39
57	DHI	Salvianolic acid B	C36H30O16	SNKFFCBZYFGCQN-VWUOOIFGSA-N	115939-25-8	718.66	4.7	9	16	3.01	-1.67	0.41
58	DHI	Salvianolic acid L	C36H30O16	CLZDRNKNWXDFQT-UHFFFAOYSA-N	N/A	N/A	N/A	N/A	N/A	N/A	N/A	N/A
59	DHI	Ethyl lithospermic acid	C29H26O12	N/A	N/A	N/A	N/A	N/A	N/A	N/A	N/A	N/A
60	DHI	Dimethyl lithospermic acid	C29H26O12	N/A	N/A	N/A	N/A	N/A	N/A	N/A	N/A	N/A
61	DHI	Salvianolic acid A	C26H22O10	YMGFTDKNIWPMGF-UCPJVGPRSA-N	96574-01-5	494.48	4.14	7	10	2.96	-0.56	0.7
62	DHI	Rosmarinic acid methyl ester	C19H18O8	XHALVRQBZGZHFE-QGZVFWFLSA-N	N/A	N/A	N/A	N/A	N/A	N/A	N/A	N/A
63	DHI	9'''-Methyl lithospermate B/isomer	C37H32O16	HBYGJMZNCIGGFN-NQBFDTSGSA-N	N/A	N/A	N/A	N/A	N/A	N/A	N/A	N/A
64	DHI	Salvianolic acid C	C26H20O10	GCJWPRRNLSHTRY-VURDRKPISA-N	115841-09-3	492.46	4.53	6	10	2.5	-0.23	0.81
65	DHI	Isomer of Salvianolic acid C	C26H20O10	N/A	N/A	N/A	N/A	N/A	N/A	N/A	N/A	N/A
66	NXT	Arginine	C6H14N4O2	ODKSFYDXXFIFQN-BYPYZUCNSA-N	4455-52-1	174.24	-1.11	7	6	47.64	-0.49	0.03
67	NXT	Malic acid	C4H6O5	BJEPYKJPYRNKOW-UWTATZPHSA-N	6915-15-7	134.1	-0.95	3	5	68.62	-1.09	0.02
68	NXT	Valine	C5H11NO2	KZSNJWFQEVHDMF-BYPYZUCNSA-N	16872-32-5	117.17	0.24	3	3	53.33	0.04	0.01
69	NXT	Proline	C5H9NO2	ONIBWKKTOPOVIA-BYPYZUCNSA-N	37159-97-0	115.15	-0.06	2	3	77.57	0.22	0.01
70	NXT	Adenosine	C10H13N5O4	OIRDTQYFTABQOQ-KQYNXXCUSA-N	30143-02-3	267.28	-2.02	5	8	15.98	-1.56	0.18
71	NXT	D-5-oxoproline	C5H7NO3	ODHCTXKNWHHXJC-GSVOUGTGSA-N	N/A	N/A	N/A	N/A	N/A	N/A	N/A	N/A
72	NXT	L-5-oxoproline	C5H7NO3	ODHCTXKNWHHXJC-VKHMYHEASA-N	16891-48-8	129.13	-0.67	2	4	96.25	-0.2	0.02
73	NXT	Isoleucine	C6H13NO2	AGPKZVBTJJNPAG-WHFBIAKZSA-N	73-32-5	131.2	0.7	3	3	59.05	0.06	0.02
74	NXT	Leucine	C6H13NO2	ROHFNLRQFUQHCH-YFKPBYRVSA-N	21675-61-6	131.2	0.63	3	3	72.92	-0.05	0.01
75	NXT	Succinic acid	C4H6O4	KDYFGRWQOYBRFD-UHFFFAOYSA-N	110-15-6	118.1	-0.41	2	4	29.62	-0.44	0.01
76	NXT	Gallic acid	C7H6O5	LNTHITQWFMADLM-UHFFFAOYSA-N	149-91-7	170.13	0.63	4	5	31.69	-0.09	0.04
77	NXT	Phenylalanine	C9H11NO2	COLNVLDHVKWLRT-QMMMGPOBSA-N	67675-33-6	165.21	0.96	3	3	41.62	0.36	0.04
78	NXT	Danshensu	C9H10O5	PAFLSMZLRSPALU-MRVPVSSYSA-N	76822-21-4	198.19	0.71	4	5	36.91	-0.27	0.06
79	NXT	Protocatechuic aldehyde	C7H6O3	IBGBGRVKPALMCQ-UHFFFAOYSA-N	139-85-5	138.13	1.06	2	3	38.35	0.43	0.03
80	NXT	Mulberroside A	C26H32O14	HPSWAEGGWLOOKT-BMFHZTKSSA-N	166734-06-1	568.58	-1.06	10	14	13.34	-2.43	0.73
81	NXT	Gallicin	C8H8O5	FBSFWRHWHYMIOG-UHFFFAOYSA-N	99-24-1	184.16	0.88	3	5	30.91	0.26	0.05
82	NXT	Catechin	C15H14O6	PFTAWBLQPZVEMU-DZGCQCFKSA-N	154-23-4	290.29	1.92	5	6	54.83	-0.03	0.24
83	NXT	Chlorogenic acid	C16H18O9	CWVRJTMFETXNAD-JUHZACGLSA-N	202650-88-2	354.34	-0.42	6	9	11.93	-1.03	0.33
84	NXT	Hydroxysafflor yellow A	C27H32O16	IAVUBSCVWHLRGE-UXEKTNMQSA-N	78281-02-4	612.59	-4.45	12	16	3.53	-3.03	0.68
85	NXT	Hydroxysafflor yellow A_qt	C15H12O6	CKKZDWXXQHXDPG-XNFBASQJSA-N	N/A	288.27	0.45	4	6	5.85	-0.5	0.2
86	NXT	o-Phthalic acid	C8H6O4	XNGIFLGASWRNHJ-UHFFFAOYSA-N	88-99-3	166.14	1.04	2	4	17.74	-0.05	0.04
87	NXT	Vanillic acid	C8H8O4	WKOLLVMJNQIZCI-UHFFFAOYSA-N	121-34-6	168.16	1.15	2	4	35.47	0.43	0.04
88	NXT	Epicatechin	C15H14O6	PFTAWBLQPZVEMU-ZFWWWQNUSA-N	35323-91-2	290.29	1.92	5	6	48.96	0.02	0.24
89	NXT	Albiflorin	C23H28O11	QQUHMASGPODSIW-WRBSMJEFSA-N	39011-90-0	480.51	-1.33	5	11	12.09	-1.54	0.77
90	NXT	Albiflorin_qt	C17H18O6	WSVOZDIRZKFUCH-UNTBTUBKSA-N	39011-90-0	318.35	0.42	2	6	66.64	-0.49	0.33
91	NXT	Rutin	C27H30O16	IKGXIBQEEMLURG-NVPNHPEKSA-N	153-18-4	610.57	-1.45	10	16	3.2	-1.93	0.68
92	NXT	p-Coumaric acid	C9H8O3	NGSWKAQJJWESNS-ZZXKWVIFSA-N	7400-08-0	164.17	1.64	2	3	43.29	0.46	0.04
93	NXT	Paeoniflorin	C23H28O11	YKRGDOXKVOZESV-WRJNSLSBSA-N	23180-57-6	480.51	-1.28	5	11	53.87	-1.47	0.79
94	NXT	Paeoniflorin_qt	C17H18O6	GWQHMWOOQLVRLG-JGAAPJFWSA-N	23180-57-6	318.35	0.46	2	6	68.18	-0.34	0.4
95	NXT	Ferulic acid	C10H10O4	KSEBMYQBYZTDHS-HWKANZROSA-N	537-98-4	194.2	1.62	2	4	39.56	0.47	0.06
96	NXT	Calycosin-7-O-glucoside	C22H22O10	WACBUPFEGWUGPB-VOFPXKNKSA-O	20633-67-4	446.44	0.41	5	10	5.49	-1.13	0.81
97	NXT	Kaempferol-3-O-rutinoside	C27H30O15	RTATXGUCZHCSNG-QHWHWDPRSA-N	17650-84-9	594.57	-1.18	9	15	3.64	-1.77	0.73
98	NXT	3,5-Di-O-Caffeoylquinic acid	C25H24O12	KRZBCHWVBQOTNZ-RDJMKVHDSA-N	89919-62-0	516.49	1.56	7	12	1.79	-1.17	0.68
99	NXT	1,5-Di-O-Caffeoylquinic acid	C25H24O12	YDDUMTOHNYZQPO-PSEXTPKNSA-N	30964-13-7	516.49	1.56	7	12	1.77	-1.13	0.68
100	NXT	Biochanin A	C16H12O5	WUADCCWRTIWANL-UHFFFAOYSA-N	491-80-5	284.28	2.32	2	5	25.21	0.65	0.24
101	NXT	Salvianolic acid A	C26H22O10	YMGFTDKNIWPMGF-UCPJVGPRSA-N	96574-01-5	494.48	4.14	7	10	2.96	-0.56	0.7
102	NXT	Salvianolic acid B	C36H30O16	SNKFFCBZYFGCQN-FTMLNOBWSA-N	115939-25-8	718.66	4.7	9	16	3.01	-1.67	0.41
103	NXT	Salvianolic acid E	C36H30O16	SOXUSBQFIOBYJU-XUQDMOJJSA-N	N/A	718.66	5.02	10	16	3.01	-1.52	0.39
104	NXT	Ononin	C22H22O9	MGJLSBDCWOSMHL-MIUGBVLSSA-N	486-62-4	430.44	0.68	4	9	11.52	-0.74	0.78
105	NXT	Calycosin	C16H12O5	ZZAJQOPSWWVMBI-UHFFFAOYSA-N	20575-57-9	284.28	2.32	2	5	47.75	0.52	0.24
106	NXT	Benzoylpaeoniflorin	C30H32O12	LATYEZNGPQKAIK-HRCYFWENSA-N	38642-49-8	584.62	0.76	4	12	31.14	-1.35	0.54
107	NXT	Formononetin	C16H12O4	HKQYGTCOTHHOMP-UHFFFAOYSA-N	485-72-3	268.28	2.58	1	4	69.67	0.78	0.21
108	NXT	(6aR,11aR)-3-Hydroxy-9,10-dimethoxy pterocarpan	C17H16O5	N/A	N/A	N/A	N/A	N/A	N/A	N/A	N/A	N/A
109	NXT	Senkyunolide F	C12H14O3	XKAWDGBGOZLBRY-XFFZJAGNSA-N	94530-84-4	206.26	1.84	1	3	40.35	0.61	0.08
110	NXT	Senkyunolide M	C16H22O4	RWIPTYNGENPFSY-GWLBWOLESA-N	N/A	278.38	2.69	1	4	3.36	0.21	0.16
111	NXT	Carnosic acid	C20H28O4	QRYRORQUOLYVBU-VBKZILBWSA-N	3650-09-07	N/A	N/A	N/A	N/A	N/A	N/A	N/A
112	NXT	Senkyunolide A	C12H16O2	ZPIKVDODKLJKIN-NSHDSACASA-N	63038-10-8	192.28	3.19	0	2	26.56	1.3	0.07
113	NXT	Tanshinone II-B	C19H18O4	XDUXBBDRILEIEZ-LJQANCHMSA-N	17397-93-2	310.37	3.57	1	4	65.26	0.44	0.45
114	NXT	Z-Butylidenephthalide	C12H12O2	WMBOCUXXNSOQHM-DHZHZOJOSA-N	551-08-6	188.24	3	0	2	42.44	1.32	0.07
115	NXT	(E)-ligustilide	C12H14O2	IQVQXVFMNOFTMU-DHZHZOJOSA-N	4431-01-0	190.26	2.94	0	2	51.3	1.3	0.07
116	NXT	(Z)-ligustilide	C12H14O2	IQVQXVFMNOFTMU-FLIBITNWSA-N	4431-01-0	190.26	2.94	0	2	23.5	1.28	0.07
117	NXT	Cryptotanshinone	C19H20O3	GVKKJJOMQCNPGB-JTQLQIEISA-N	35825-57-1	296.39	3.44	0	3	52.34	0.95	0.4
118	NXT	Hydroxyl calendic acid	C18H30O3	N/A	N/A	N/A	N/A	N/A	N/A	N/A	N/A	N/A
119	NXT	Tanshinone IIA	C19H18O3	HYXITZLLTYIPOF-UHFFFAOYSA-N	568-72-9	294.37	4.66	0	3	49.89	1.05	0.4
120	NXT	Sucrose	C12H22O11	CZMRCDWAGMRECN-UGDNZRGBSA-N	57-50-1	342.34	-4.31	8	11	7.17	-2.89	0.23
121	NXT	1′-O-galloyl sucrose	C19H26O15	XPQHIVBLCNQLEF-RDWBPHHJSA-N	N/A	N/A	N/A	N/A	N/A	N/A	N/A	N/A
122	NXT	6′-O-galloyl sucrose	C19H26O15	N/A	N/A	N/A	N/A	N/A	N/A	N/A	N/A	N/A
123	NXT	5-HMF	C6H6O3	NOEGNKMFWQHSLB-UHFFFAOYSA-N	67-47-0	126.12	0.67	1	3	45.07	0.05	0.02
124	NXT	Protocatechuic acid	C7H6O4	YQUVCSBJEUQKSH-UHFFFAOYSA-N	99-50-3	154.13	0.9	3	4	25.37	0.1	0.04
125	NXT	Neochlorogenic acid	C16H18O9	CWVRJTMFETXNAD-BBDSCLQGSA-N	906-33-2	354.34	-0.42	6	9	11.93	-1.35	0.33
126	NXT	Oxypaeoniflorin	C23H28O12	FCHVXNVDFYXLIL-WRJNSLSBSA-N	39011-91-1	496.51	-1.55	6	12	8.38	-1.62	0.78
127	NXT	Oxypaeoniflorin_qt	C17H18O7	FICRKDWVMQNZMX-JGAAPJFWSA-N	39011-91-1	334.35	0.2	3	7	19.4	-0.77	0.44
128	NXT	Caffeic acid	C9H8O4	QAIPRVGONGVQAS-DUXPYHPUSA-N	501-16-6	180.17	1.37	3	4	25.76	0.21	0.05
129	NXT	Amygdalin	C20H27NO11	XUCIJNAGGSZNQT-JHSLDZJXSA-N	29883-15-6	457.48	-2.3	7	12	4.42	-1.91	0.61
130	NXT	Carthamidin\isocarthamidin 2×glu/gal	C27H32O16	YIVXUBJSZSRYMU-UHFFFAOYSA-N	N/A	N/A	N/A	N/A	N/A	N/A	N/A	N/A
131	NXT	Quercetin-3-rutinose glucoside	C33H40O21	SPUFXPFDJYNCFD-YQJBXTIASA-N	30311-61-6	N/A	N/A	N/A	N/A	N/A	N/A	N/A
132	NXT	Quercetin-Di-glucoside	C27H30O17	RPVIQWDFJPYNJM-DEFKTLOSSA-N	N/A	N/A	N/A	N/A	N/A	N/A	N/A	N/A
133	NXT	Isopaeoniflorin or Albiflorin R1	C23H28O11	VKKJTFDSHDZOGR-DNITZUGTSA-N	N/A	480.51	-1.91	5	11	21.29	-1.53	0.82
134	NXT	Albiflorin R1_qt	C17H18O6	XAICEJVIGDIHIZ-LRLBUVDJSA-N	N/A	318.35	-0.17	2	6	26.18	-0.46	0.34
135	NXT	Mudanpioside I	C23H28O11	XPSPAXSLPOGEEE-ZVNWRJMWSA-N	N/A	N/A	N/A	N/A	N/A	N/A	N/A	N/A
136	NXT	Galloylpaeoniflorin	C30H32O15	KLFIUQCKSSAFFU-QHOIGUMUSA-N	122965-41-7	632.62	-0.04	7	15	3.03	-1.77	0.42
137	NXT	Galloylalbiflorin isomer	C30H32O15	N/A	N/A	N/A	N/A	N/A	N/A	N/A	N/A	N/A
138	NXT	Senkyunolide I	C12H16O4	DQNGMIQSXNGHOA-JXQVETIVSA-N	94596-28-8	224.28	1.32	2	4	26.78	0	0.1
139	NXT	Lithospermate	C27H22O12	N/A	N/A	N/A	N/A	N/A	N/A	N/A	N/A	N/A
140	NXT	Calycosin-7-O-β-D-glc-6''-O-malonate	C25H24O13	KNBDAYPNFRHTOM-GOZZSVHWSA-N	N/A	N/A	N/A	N/A	N/A	N/A	N/A	N/A
141	NXT	Rosmarinic acid	C18H16O8	DOUMFZQKYFQNTF-WUTVXBCWSA-N	20283-92-5	360.34	2.69	5	8	1.38	-0.54	0.35
142	NXT	Senkyunolide F isomer	C12H14O3	N/A	N/A	N/A	N/A	N/A	N/A	N/A	N/A	N/A
143	NXT	Lithospermic acid	C27H22O12	UJZQBMQZMKFSRV-RGKBJLTCSA-N	28831-65-4	538.49	3.38	7	12	2.67	-1.07	0.76
144	NXT	Salvianolic acid L	C36H30O16	CLZDRNKNWXDFQT-UHFFFAOYSA-N	N/A	N/A	N/A	N/A	N/A	N/A	N/A	N/A
145	NXT	Wogonin	C16H12O5	XLTFNNCXVBYBSX-UHFFFAOYSA-N	632-85-9	284.28	2.59	2	5	30.68	0.79	0.23
146	NXT	Dicaffeoylquinic acid isomer	C25H24O12	N/A	N/A	N/A	N/A	N/A	N/A	N/A	N/A	N/A
147	NXT	Senkyunolide H	C12H16O4	DQNGMIQSXNGHOA-GMUFXDHJSA-N	94596-27-7	224.28	1.32	2	4	34.34	-0.02	0.1
148	NXT	Procyanidin B1	C30H26O12	XFZJEEAOWLFHDH-UKWJTHFESA-N	20315-25-7	578.56	3.36	10	12	67.87	-0.98	0.66
149	NXT	Butylphthalide isomer	C12H14O2	N/A	N/A	N/A	N/A	N/A	N/A	N/A	N/A	N/A
150	NXT	Danshenxinkun D	C21H20O4	LOLTUKHHUOCHAV-UHFFFAOYSA-N	98873-76-8	N/A	N/A	N/A	N/A	N/A	N/A	N/A
151	NXT	Neocnidilide	C12H18O2	UPJFTVFLSIQQAV-KOLCDFICSA-N	4567-33-3	194.3	3.37	0	2	83.83	1.23	0.07
152	NXT	Mulberrin	C25H26O6	MUUDYSFWQUSAOO-UHFFFAOYSA-N	19275-47-9	422.51	5.74	4	6	1.22	0.46	0.59
153	NXT	Sugiol	C20H28O2	IPEHJNRNYPOFII-AZUAARDMSA-N	511-05-7	300.48	4.99	1	2	36.11	1.14	0.28
154	NXT	Lindestrene	C15H18O	BZQURGSQMBBPRU-UKRRQHHQSA-N	2221-88-7	214.33	3.67	0	1	36.12	1.75	0.13
155	NXT	Ligustilide dimer	C24H28O4	TYSOMZQRYGBSKN-BSHHJLFISA-N	89354-45-0	380.52	5.17	0	4	9.83	0.79	0.7
156	NXT	Riligustilide	C24H28O4	TYSOMZQRYGBSKN-DRQJQJQISA-N	89354-45-0	380.52	5.17	0	4	11.98	0.74	0.7
157	NXT	(z)-9-Octadecenamide	C18H35NO	FATBGEAMYMYZAF-KTKRTIGZSA-N	301-02-0	281.54	6.23	2	2	31.2	1.26	0.14
158	NXT	Citric acid	C6H8O7	KRKNYBCHXYNGOX-UHFFFAOYSA-N	77-92-9	192.14	-1.39	4	7	56.22	-1.11	0.05
159	NXT	Palmitic acid	C16H32O2	IPCSVZSSVZVIGE-UHFFFAOYSA-N	1957-10-03	256.48	6.37	1	2	19.3	1.09	0.1
160	NXT	Senkyunolide B	C12H12O3	XLFDJKJEYMKLJX-YFHOEESVSA-N	93236-67-0	204.24	2.74	1	3	62.68	1	0.08
161	NXT	Senkyunolide C	C12H12O3	NRENRLOUWSVYIA-WCIBSUBMSA-N	91652-78-7	204.24	2.74	1	3	46.8	0.87	0.08
162	NXT	7-Hydroxycoumarin	C9H6O3	ORHBXUUXSCNDEV-UHFFFAOYSA-N	93-35-6	162.15	1.63	1	3	27.37	0.74	0.05
163	NXT	Benzoic acid	C7H6O2	WPYMKLBDIGXBTP-UHFFFAOYSA-N	65-85-0	121.12	0.76	0	2	31.55	0.54	0.02
164	NXT	Quercetin-7-O-glucoside	C21H20O12	BBFYUPYFXSSMNV-MVGIBOQKSA-N	491-50-9	464.41	-0.4	8	12	2.85	-1.36	0.79
165	NXT	Pentagalloyl glucose	C41H32O26	QJYNZEYHSMRWBK-NIKIMHBISA-N	14937-32-7	940.72	3.69	15	26	3.01	-3.08	0.21
166	NXT	4-Hydroxyl-3-butylphthalide	C12H14O3	JQSVHBFDZXZENO-UHFFFAOYSA-N	74459-23-7	206.26	2.99	1	3	70.31	0.9	0.08
167	NXT	N1-N5-(Z)-N10-(E)-tri-p-coumaroylspermidine	C34H37N3O6	PFDVWJCSCYDRMZ-XWBZMVROSA-N	N/A	583.74	4.26	5	9	1.45	-0.14	0.53
168	NXT	Pratensein	C16H12O6	FPIOBTBNRZPWJW-UHFFFAOYSA-N	2284-31-3	299.27	1.37	2	6	39.06	0.39	0.28
169	NXT	Astragaloside IV	C41H68O14	QMNWISYXSJWHRY-YLNUDOOFSA-N	83207-58-3	785.09	-0.35	9	14	17.74	-2.22	0.15
170	NXT	Astragaloside IV_qt	C35H58O9	VXHVFDQYSSFKAR-SLFWFADNSA-N	N/A	622.93	1.4	6	9	7.07	-0.85	0.32
171	NXT	Astragaloside II	C43H70O15	AYWNHWGQTMCQIV-PENCHUSISA-N	84676-89-1	827.13	0.03	8	15	46.06	-2.05	0.13
172	NXT	Astragaloside II_qt	C37H60O10	KILZIJKCZIGLFJ-QOICHAAMSA-N	84676-89-1	664.97	1.78	5	10	11.55	-1.05	0.25
173	NXT	Soyasaponin I	C48H78O18	PTDAHAWQAGSZDD-IOVCITQVSA-N	51330-27-9	943.26	0.97	11	18	2.06	-2.75	0.05
174	NXT	Methyl tanshinonate	C20H18O5	YFDKIHAZVQFLRC-FQEVSTJZSA-N	N/A	338.38	4.03	0	5	19.19	0.56	0.55
175	NXT	Kaempferol-3-O-glucoside	C21H20O11	JPUKWEQWGBDDQB-QSOFNFLRSA-N	480-10-4	448.41	-0.32	7	11	14.03	-1.34	0.74
176	NXT	Hydroxytanshinone IIA	C19H18O4	UPCWCCRFMPIOAP-UHFFFAOYSA-N	18887-18-8	310.37	3.56	1	4	44.93	0.53	0.44
177	NXT	3-Butylidene-7-hydroxyphalide	C12H12O3	XLFDJKJEYMKLJX-YFHOEESVSA-N	93236-67-0	204.24	2.74	1	3	62.68	1	0.08
178	NXT	Salvianolic acid F	C17H14O6	PULWRMOKQNWQBD-LZSLGQGWSA-N	N/A	N/A	N/A	N/A	N/A	N/A	N/A	N/A
179	NXT	Kumatakenin	C17H14O6	BJBUTJQYZDYRMJ-UHFFFAOYSA-N	3301-49-3	314.31	2.09	2	6	50.83	0.61	0.29
180	NXT	Trijuganone B	C18H16O3	AZIUYJPOBCMPON-UHFFFAOYSA-N	126979-84-8	280.34	2.98	0	3	38.75	0.96	0.36
181	NXT	O-Phthalic anhydride	C8H4O3	LGRFSURHDFAFJT-UHFFFAOYSA-N	85-44-9	148.12	1.3	0	3	47.31	0.56	0.04
182	NXT	Angelicide	C24H28O4	TYSOMZQRYGBSKN-UHFFFAOYSA-N	N/A	N/A	N/A	N/A	N/A	N/A	N/A	N/A
183	NXT	Carthamidin	C15H12O6	NPLTVGMLNDMOQE-NSHDSACASA-N	479-54-9	288.27	2.03	4	6	41.15	0.16	0.24
184	NXT	Linoleic acid	C18H32O2	OYHQOLUKZRVURQ-HZJYTTRNSA-N	60-33-3	280.5	6.39	1	2	41.9	1.16	0.14
185	NXT	Acetyl-11-keto-β-boswellic acid	C32H48O5	HMMGKOVEOFBCAU-BCDBGHSCSA-N	67416-61-9	512.8	5.92	1	5	17.79	0.2	0.67
186	NXT	Oleanolic acid	C30H48O3	MIJYXULNPSFWEK-GTOFXWBISA-N	508-02-1	456.78	6.42	2	3	29.02	0.59	0.76
187	NXT	Amygdalinic acid	C20H28O13	IHWHGPUDYPIVLL-CRWNPXAFSA-N	66427-92-7	476.48	-2.57	8	13	4.15	-2.32	0.63
188	NXT	Mandelic acid-β-D-glucopyranoside	C14H18O8	PRBPGFIPERGSFI-SSLNLQFTSA-N	N/A	314.32	-0.82	5	8	8.27	-1.22	0.2
189	NXT	Benzyl beta-gentiobioside	C19H28O11	LLEMMFPELBNINR-LVNMIFGJSA-N	56775-64-5	432.47	-2.27	7	11	3.46	-2.07	0.56
190	NXT	Scopolin	C16H18O9	SGTCGCCQZOUMJJ-YMILTQATSA-N	531-44-2	354.34	-0.29	4	9	25.5	-0.88	0.39
191	NXT	6-Hydroxy kaempferol-di-O-glucoside	C27H30O17	GIHCVNUAKOTVCJ-MOZNSQNKSA-N	N/A	626.57	-2.49	11	17	4.21	-2.86	0.68
192	NXT	Tetragalloylglucose	C34H28O22	RATQVALKDAUZBW-XPMKZLBQSA-N	79886-50-3	788.62	2.45	13	22	3.01	-2.26	0.33
193	NXT	Prunasin	C14H17NO6	ZKSZEJFBGODIJW-GMDXDWKASA-N	99-18-3	295.32	-0.55	4	7	12.61	-0.79	0.18
194	NXT	1,8-Dihydroxy-3-methyl anthracene-9,10-dione	C15H10O4	LQGUBLBATBMXHT-UHFFFAOYSA-N	481-74-3	254.25	2.76	2	4	18.64	0.62	0.21
195	NXT	Daidzoside	C21H20O9	KYQZWONCHDNPDP-QNDFHXLGSA-N	552-66-9	416.41	0.43	5	9	14.32	-1	0.73
196	NXT	Feruloylquinic acid	C17H20O9	RAGZUCNPTLULOL-KJJWLSQTSA-N	1899-29-2	368.37	-0.16	5	9	25.51	-0.86	0.36
197	NXT	1,2,3,6-Tetragalloylglucose	C34H28O22	RATQVALKDAUZBW-XPMKZLBQSA-N	79886-50-3	788.62	2.45	13	22	3.01	-2.26	0.33
198	NXT	Oxypaeoniflorin isomer	C23H28O12	N/A	N/A	N/A	N/A	N/A	N/A	N/A	N/A	N/A
199	NXT	2,3,4,6-Tetragalloylglucose	C34H28O22	RJINLRBSXMOGAQ-MXRHIPGXSA-N	N/A	N/A	N/A	N/A	N/A	N/A	N/A	N/A
200	NXT	Ecdysterone	C27H44O7	NKDFYOWSKOHCCO-YPVLXUMRSA-N	5289-74-7	480.71	1	6	7	5.3	-1.32	0.82
201	NXT	Ethyl gallate	C9H10O5	VFPFQHQNJCMNBZ-UHFFFAOYSA-N	831-61-8	198.19	1.23	3	5	25.61	0.33	0.06
202	NXT	Stigmasterol-beta-D-glucoside	C35H58O6	VWDLOXMZIGUBKM-CQJGLIEWSA-N	19716-26-8	574.93	5.89	4	6	21.32	-0.26	0.63
203	NXT	Luteolin	C15H10O6	IQPNAANSBPBGFQ-UHFFFAOYSA-N	491-70-3	286.25	2.07	4	6	36.16	0.19	0.25
204	NXT	Saffloryellow A	C27H30O15	YKDBQWHZEDSTAI-HFAXBUHJSA-N	85532-77-0	594.57	-4.03	10	15	22.75	-2.52	0.75
205	NXT	Scopoletin	C10H8O4	RODXRVNMMDRFIK-UHFFFAOYSA-N	92-61-5	192.18	1.62	1	4	27.77	0.71	0.08
206	NXT	Galloylpaeoniflorin isomer	C30H32O15	N/A	N/A	N/A	N/A	N/A	N/A	N/A	N/A	N/A
207	NXT	Luteolin-7-O-β-D-glucopyranoside	C21H20O11	PEFNSGRTCBGNAN-RSRIQPTJSA-N	26811-41-6	448.41	0.16	7	11	7.29	-1.23	0.78
208	NXT	Senkyunolide J	C12H18O4	AXRIHSJZHOTGAE-UHFFFAOYSA-N	N/A	226.3	1.57	2	4	42.34	0.06	0.1
209	NXT	Oxyresveratrol	C14H12O4	PDHAOJSHSJQANO-OWOJBTEDSA-N	4721-07-07	244.26	2.75	4	4	109.29	0.55	0.13
210	NXT	Safflomin C	C30H30O14	UCXUCVMTWJPTSS-BSUGEMKNSA-N	N/A	614.6	-0.95	10	14	5.57	-2.01	0.66
211	NXT	Safflomin C_qt	C24H20O9	MDIXVVOAPSODNZ-AWZJDSBOSA-N	N/A	452.44	1.52	6	9	3.53	-0.85	0.59
212	NXT	Safflomin C isomer	C30H30O14	N/A	N/A	N/A	N/A	N/A	N/A	N/A	N/A	N/A
213	NXT	Lithospermic acid isomer	C27H22O12	N/A	N/A	N/A	N/A	N/A	N/A	N/A	N/A	N/A
214	NXT	Senkyunolide I isomer	C12H16O4	N/A	N/A	N/A	N/A	N/A	N/A	N/A	N/A	N/A
215	NXT	Afromosin	C17H14O5	KJGPBYUQZLUKLL-UHFFFAOYSA-N	550-79-8	298.31	2.57	1	5	23.54	0.77	0.27
216	NXT	9,10-Dimethoxy-pterocarpane-3-O-β-D-glucoside	C23H26O10	PCIXSTFFMHVOMF-PBGSHFJYSA-N	94367-42-7	462.49	0.74	4	10	36.74	-0.63	0.92
217	NXT	Daidzein	C15H10O4	ZQSIJRDFPHDXIC-UHFFFAOYSA-N	486-66-8	254.25	2.33	2	4	19.44	0.59	0.19
218	NXT	Coumarin	C9H6O2	ZYGHJZDHTFUPRJ-UHFFFAOYSA-N	91-64-5	146.15	1.9	0	2	29.17	1.2	0.04
219	NXT	Formononetin-7-O-β-D-glc-6′′-O-malonate	C25H24O12	RDTAGQKYPGLCBK-GOZZSVHWSA-N	N/A	N/A	N/A	N/A	N/A	N/A	N/A	N/A
220	NXT	N1,N5,N10-(E)-tri-p-coumaroylspermidine	C34H37N3O6	PFDVWJCSCYDRMZ-AUCPOXKISA-N	131086-78-7	583.74	4.26	5	9	1.45	-0.12	0.53
221	NXT	Tanshindiol C	C18H16O5	RTKDBIDPGKCZJS-KZULUSFZSA-N	96839-30-4	312.34	2.34	2	5	42.85	-0.04	0.45
222	NXT	5,7-Dihydrox-4′-methoxyisoflavone	C16H12O5	WUADCCWRTIWANL-UHFFFAOYSA-N	491-80-5	284.28	2.32	2	5	25.21	0.65	0.24
223	NXT	Quercetin	C15H10O7	REFJWTPEDVJJIY-UHFFFAOYSA-N	117-39-5	302.25	1.5	5	7	46.43	0.05	0.28
224	NXT	N1(E)-N5-(Z)-N10-(E)-tri-p-coumaroylspermidine	C34H37N3O6	PFDVWJCSCYDRMZ-XWBZMVROSA-N	N/A	583.74	4.26	5	9	1.45	-0.14	0.53
225	NXT	Ethyl lithospermate/Dimethyl Lithospermate	C29H26O12	YAXTXMBBIHBGPZ-ZBBBDWFHSA-N	N/A	566.55	3.89	5	12	2.66	-0.7	0.73
226	NXT	Tanshindiol B	C18H16O5	RTKDBIDPGKCZJS-KPZWWZAWSA-N	97465-70-8	312.34	2.34	2	5	42.67	0.05	0.45
227	NXT	N1(Z)-N5-(Z)-N10-(E)-tri-p-coumaroylspermidine	C34H37N3O6	PFDVWJCSCYDRMZ-XWBZMVROSA-N	N/A	583.74	4.26	5	9	1.45	-0.14	0.53
228	NXT	Ginsenoside Ro	C48H76O19	NFZYDZXHKFHPGA-QQHDHSITSA-N	34367-04-9	957.24	1.23	11	19	1.95	-2.96	0.05
229	NXT	Ginsenoside Ro_qt	C30H48O3	MIJYXULNPSFWEK-CGXHKNHBSA-N	34367-04-9	455.77	5.74	1	3	17.62	0.38	0.76
230	NXT	Aloeemodin	C15H10O5	YDQWDHRMZQUTBA-UHFFFAOYSA-N	481-72-1	270.25	1.67	3	5	83.38	-0.12	0.24
231	NXT	Genistein	C15H10O5	TZBJGXHYKVUXJN-UHFFFAOYSA-N	446-72-0	270.25	2.07	3	5	17.93	0.43	0.21
232	NXT	N1,N5,N10-(Z)-tri-p-coumaroylspermidine	C34H37N3O6	PFDVWJCSCYDRMZ-AUCPOXKISA-N	131086-78-7	583.74	4.26	5	9	1.45	-0.12	0.53
233	NXT	Kaempferol	C15H10O6	IYRMWMYZSQPJKC-UHFFFAOYSA-N	520-18-3	286.25	1.77	4	6	41.88	0.26	0.24
234	NXT	Chikusetsusaponin IV	C47H74O18	KQSFNXMDCOFFGW-GNDIVNLPSA-N	7518-22-1	927.21	1.74	10	18	14.73	-2.84	0.06
235	NXT	Achyranthoside A	C47H70O20	UOGGJUUNBPSGHY-GGWBBDQDSA-N	158511-54-7	955.17	2.66	9	20	8.31	-3.1	0.05
236	NXT	Achyranthoside A_qt	C41H60O15	JZICHZJWNUYONS-BBNAMSMLSA-N	158511-54-7	793.01	4.57	6	15	17.78	-2.06	0.11
237	NXT	Isoliquiritigenin	C15H12O4	DXDRHHKMWQZJHT-FPYGCLRLSA-N	961-29-5	256.27	2.9	3	4	85.32	0.44	0.15
238	NXT	Astragaloside II isomer	C43H70O15	N/A	N/A	N/A	N/A	N/A	N/A	N/A	N/A	N/A
239	NXT	2′-Hydroxy-4′-methoxyacetopheone	C9H10O3	UILPJVPSNHJFIK-UHFFFAOYSA-N	552-41-0	166.19	1.29	1	3	28.79	0.93	0.04
240	NXT	Afromosin isomer	C17H14O5	N/A	N/A	N/A	N/A	N/A	N/A	N/A	N/A	N/A
241	NXT	2′-Methoxycinnamaldehyde	C10H10O2	KKVZAVRSVHUSPL-UHFFFAOYSA-N	1504-74-1	162.2	1.93	0	2	26.52	1.19	0.04
242	NXT	Palbinone	C22H30O4	KIAKLFLISZCITK-PPAUHQMUSA-N	139954-00-0	358.52	2.69	2	4	43.56	0	0.53
243	NXT	Farrerol	C17H16O5	DYHOLQACRGJEHX-ZDUSSCGKSA-N	24211-30-1	300.33	3.27	3	5	42.65	0.59	0.26
244	NXT	Malonylastragaloside II	C46H72O18	N/A	N/A	N/A	N/A	N/A	N/A	N/A	N/A	N/A
245	NXT	Senkyunolide B or C isomer	C43H70O15	N/A	N/A	N/A	N/A	N/A	N/A	N/A	N/A	N/A
246	NXT	Isoastragaloside	C45H72O16	HVPKALQHGQMJER-XOUPSZAESA-N	84676-88-0	N/A	N/A	N/A	N/A	N/A	N/A	N/A
247	NXT	Astragaloside I	C45H72O16	KXHCYYSIAXMSPA-OOCCOBHWSA-N	84680-75-1	869.17	0.41	7	16	46.79	-2.28	0.11
248	NXT	Astragaloside I_qt	C39H62O11	HAUCZONIQZLEEW-SQCLOWIESA-N	84680-75-1	707.01	2.16	4	11	12.34	-1.15	0.2
249	NXT	Malonylastragaloside I	C48H74O19	BNTPSXOHFWUAIB-UCTCECGMSA-N	N/A	N/A	N/A	N/A	N/A	N/A	N/A	N/A
250	NXT	Danshenxinkun A	C18H16O4	GRGPQNRHXNRJFL-UHFFFAOYSA-N	65907-75-7	296.34	2.44	2	4	45.64	0.48	0.3
251	NXT	Butylphthalide	C12H14O2	HJXMNVQARNZTEE-UHFFFAOYSA-N	6066-49-5	190.26	3.25	0	2	47.9	1.3	0.07
252	NXT	E-butylidenephthalide	C12H12O2	WMBOCUXXNSOQHM-FLIBITNWSA-N	551-08-6	188.24	3	0	2	53.72	1.3	0.07
253	NXT	Furo [3,2-c]naphth [2,1-e]oxepin-10,12-dione	C19H18O4	N/A	N/A	N/A	N/A	N/A	N/A	N/A	N/A	N/A
254	NXT	Methylene tanshinone	C18H14O3	N/A	N/A	N/A	N/A	N/A	N/A	N/A	N/A	N/A
255	NXT	Dihydrotanshinone I	C18H14O3	HARGZZNYNSYSGJ-JTQLQIEISA-N	87205-99-0	278.32	2.86	0	3	45.04	0.95	0.36
256	NXT	Acetylastragaloside I	C47H74O17	KWZSMZJAHIHRRT-OXLQADOBSA-N	84687-47-8	911.21	0.79	6	17	43.54	-2.18	0.09
257	NXT	Acetylastragaloside I_qt	C41H64O12	YEXAKIVRCUYYCW-GJWPHNHISA-N	84687-47-8	749.05	2.54	3	12	30.75	-1.07	0.17
258	NXT	Furanodiene	C15H20O	VMDXHYHOJPKFEK-IAVOFVOCSA-N	19912-61-9	216.35	4.63	0	1	45.11	1.77	0.1
259	NXT	Tanshinone I	C18H12O3	AIGAZQPHXLWMOJ-UHFFFAOYSA-N	568-73-0	276.3	4.08	0	3	29.27	1.05	0.36
260	NXT	Cyclomulberrin	C25H24O6	SYFDWXWLRGHYAJ-UHFFFAOYSA-N	19275-51-5	420.49	5.38	3	6	9.84	0.72	0.84
261	NXT	Senkyunolide P	C24H30O4	YTEUTQUNVHWZOR-XTLIZWHYSA-N	142864-23-1	382.54	5.22	0	4	9.38	0.92	0.81
262	NXT	Senkyunolide P isomer	C24H30O4	N/A	N/A	N/A	N/A	N/A	N/A	N/A	N/A	N/A
263	NXT	Miltirone	C19H22O2	FEFAIBOZOKSLJR-UHFFFAOYSA-N	27210-57-7	282.41	4.73	0	2	38.76	1.23	0.25
264	NXT	1,2-Dihydrotashinone	C18H14O3	OYOSADAKNZWZGA-UHFFFAOYSA-N	77769-21-2	278.32	4.21	0	3	19.95	1.07	0.36
265	NXT	Tokinolide B	C24H28O4	DZMFTLLDUYBHLI-MUSNRYMWSA-N	112966-16-2	N/A	N/A	N/A	N/A	N/A	N/A	N/A
266	NXT	Levistolide A	C24H28O4	UBBRXVRQZJSDAK-ZJHGLIIDSA-N	88182-33-6	380.52	4.97	0	4	9.96	0.96	0.82
267	NXT	Z,Z-3,3,8,8- diligustilide	C24H28O4	UBBRXVRQZJSDAK-XOAWRVBSSA-N	N/A	380.52	5.17	0	4	11.98	0.74	0.7
268	NXT	8-O-Debenzoylpaeoniflorin	C16H24O10	LTXNSYGCFNCQRW-DKCIEBLWSA-N	N/A	N/A	N/A	N/A	N/A	N/A	N/A	N/A
269	NXT	Salvianolic acid D	C20H18O10	KFCMFABBVSIHTB-WUTVXBCWSA-N	142998-47-8	418.38	2.33	6	10	1.57	-0.78	0.5
270	NXT	Methyl gallate	C8H8O5	FBSFWRHWHYMIOG-UHFFFAOYSA-N	99-24-1	184.16	0.88	3	5	30.91	0.26	0.05
271	NXT	1′-O-Benzoylsucrose	C19H26O12	SYDJVRWZOWPNNO-OVUASUNJSA-N	123499-67-2	N/A	N/A	N/A	N/A	N/A	N/A	N/A
272	NXT	Daidzein isomer	C15H10O4	N/A	N/A	N/A	N/A	N/A	N/A	N/A	N/A	N/A
273	NXT	Taxifolin	C15H12O7	CXQWRCVTCMQVQX-LSDHHAIUSA-N	480-18-2	304.27	1.49	5	7	57.84	-0.23	0.27
274	NXT	Skinorim	C9H16O4	BDJRBEYXGGNYIS-UHFFFAOYSA-N	123-99-9	188.25	1.87	2	4	16.9	-0.04	0.04
275	NXT	Benzoyloxypaeoniflorin	C30H32O13	VIWQCBZFJFSCLC-HRCYFWENSA-N	N/A	N/A	N/A	N/A	N/A	N/A	N/A	N/A
276	NXT	Quercetin isomer	C15H10O7	N/A	N/A	N/A	N/A	N/A	N/A	N/A	N/A	N/A
277	NXT	1-O-b-D-glucopyranosyl-paeonisuffrone	C16H24O9	YATDWAKBCSRCTG-DRPYYMADSA-N	N/A	N/A	N/A	N/A	N/A	N/A	N/A	N/A
278	NXT	Cinnamic acid	C9H8O2	WBYWAXJHAXSJNI-VOTSOKGWSA-N	140-10-3	148.17	1.9	1	2	19.68	0.91	0.03
279	NXT	Salvianolic acid C	C26H20O10	GCJWPRRNLSHTRY-VURDRKPISA-N	115841-09-3	492.46	4.53	6	10	2.5	-0.23	0.81
280	NXT	Morin	C15H10O7	YXOLAZRVSSWPPT-UHFFFAOYSA-N	480-16-0	302.25	1.5	5	7	46.23	0	0.27
281	NXT	Apigenin	C15H10O5	KZNIFHPLKGYRTM-UHFFFAOYSA-N	520-36-5	270.25	2.33	3	5	23.06	0.43	0.21
282	NXT	Coniferyl ferulate	C20H20O6	PGLIMMMHQDNVRS-YZQQHVNFSA-N	63644-62-2	356.4	3.64	2	6	4.54	0.71	0.39
283	NXT	Carthamin	C43H42O22	UZPQVEVQJJKELH-LKUNIQDJSA-N	36338-96-2	910.85	-4.13	15	22	3.09	-4.28	0.25
284	NXT	Chikusetsusaponin IVa	C42H66O14	YOSRLTNUOCHBEA-SGVKAIFKSA-N	51415-02-2	795.08	2.98	8	14	6.82	-1.8	0.14
285	NXT	Chikusetsusaponin Iva_qt	C36H56O9	IUCHKMAZAWJNBJ-MIINLVTMSA-N		632.92	4.88	5	9	7.68	-0.46	0.34
286	NXT	Chikusetsusaponin IVa isomer	C42H66O14	N/A	N/A	N/A	N/A	N/A	N/A	N/A	N/A	N/A
287	NXT	Achyranthoside C	C47H72O20	GNCYMXULNXKROG-CILHHZHMSA-N	168111-48-6	957.19	2.29	10	20	4.26	-2.64	0.08
288	NXT	Achyranthoside C_qt	C41H62O15	FHMLSFRFOXEUGU-ICJJKWSHSA-N	168009-90-3	795.03	4.19	7	15	66.62	-1.92	0.18
289	NXT	4-Hydroxyl-3-butylphthalide isomer	C12H14O3	N/A	N/A	N/A	N/A	N/A	N/A	N/A	N/A	N/A
290	NXT	Senkyunolide E	C12H12O3	RAGLCXMIVOLFJJ-XFFZJAGNSA-N	94530-83-3	204.24	1.9	1	3	34.4	0.55	0.08
291	NXT	13-Hydroxy-9,11- hexadecadienoic acid	C18H32O3	N/A	N/A	N/A	N/A	N/A	N/A	N/A	N/A	N/A
292	NXT	Mulberrofuran A	C25H28O4	MQYYTNPXQXSQGM-CAOOACKPSA-N	68978-04-1	392.53	7.08	2	4	4.45	1.04	0.53
293	NXT	Linoleic acid isomer	C18H32O2	N/A	N/A	N/A	N/A	N/A	N/A	N/A	N/A	N/A

## Sheet: Table S2
Table S2: The detailed information of DHI-ingredient targets, NXT-ingredient targets and IS targets.
DHI-ingredient targets			NXT-ingredient targets			IS targets
Compound	Target	Source	Compound	Target	Source	Target	Source
5-Hydroxymethylfurfural	SDHA	STITCH	Gallic acid	GATA3	STITCH	HCAR2	TTD
	SULT1A1	STITCH		ABCB1	STITCH	CPB2	TTD
	SULT1A2	STITCH		JUN	STITCH	PLG	TTD
	HBA2	STITCH		ATM	STITCH	MMP3	TTD
	HBB	STITCH		CASP3	STITCH	SCN1A	TTD
	ADH1C	TCMSP		EIF2AK3	STITCH	PTAFR	TTD
	LYZ	TCMSP		TYR	STITCH	CAPN2	TTD
	cobT	TCMSP		UGT2B17	STITCH	HTR2B	TTD
	CHRM3	TCMSP		MMP2	STITCH	PARP1	TTD
	F2	TCMSP		SERPINE1	STITCH	PTAFR	TTD
	CHRM1	TCMSP		CHUK	STITCH	F10	TTD
	GABRA2	TCMSP		PRKCA	STITCH	DRD2	TTD
	ACHE	TCMSP		CASP7	STITCH	HTR2A	TTD
	GABRA5	TCMSP		SULT1A1	STITCH	VKORC1	TTD
	GABRA3	TCMSP		MPO	STITCH	HDAC1	TTD
	CHRM2	TCMSP		CAT	STITCH	PROC	TTD
	GABRA1	TCMSP		MMP9	STITCH	PARP1	TTD
	DPP4	TCMSP		APOB	STITCH	PLAU	TTD
	IGHG1	TCMSP		AKT1	STITCH	GLRB	TTD
	ADH1B	TCMSP		RHOB	STITCH	CASR	TTD
	PTGS1	TCMSP		CDH11	STITCH	CNR2	TTD
	PTGS2	TCMSP		PTGS1	TCMSP	CNR1	TTD
	GRIA2	TCMSP		PTGS2	TCMSP	GABRA1	TTD
	GABRA6	TCMSP		MAOB	TCMSP	GABRA2	TTD
Danshensu	PTGS1	TCMSP		PGR	TCMSP	GABRB2	TTD
	F2	TCMSP		PTPN1	TCMSP	SCN1A	TTD
	ADRB1	TCMSP		TOP2A	TCMSP	GRIN2A	TTD
	PTGS2	TCMSP		HSP90AA1	TCMSP	HBA1	TTD
	ADRA2A	TCMSP		PIK3CG	TCMSP	HBA2	TTD
	ADRA2C	TCMSP		CASP9	TCMSP	EGFR	TTD
	ACHE	TCMSP		CASP3	TCMSP	PLG	TTD
	ADRA2B	TCMSP		TP53	TCMSP	AOC3	TTD
	ADRB2	TCMSP		FASN	TCMSP	DLG4	TTD
	ADRA1D	TCMSP		FASLG	TCMSP	FAS	TTD
	DPP4	TCMSP		MGST1	TCMSP	ALDH2	TTD
	LACTB	TCMSP		CYP3A43	TCMSP	CPB2	TTD
	LTA4H	TCMSP		CA2	Binding DB	GRIN1	TTD
	MAOB	TCMSP		CA1	Binding DB	ADORA3	TTD
	CTRB1	TCMSP		CA5A	Binding DB	GRIN2B	TTD
	RELA	TCMSP		CA7	Binding DB	EPO	TTD
	SOD1	TCMSP		CA6	Binding DB	KCNMB4	TTD
	TIMP1	TCMSP		CA9	Binding DB	NGFR	TTD
	TGFB1	TCMSP		CA14	Binding DB	ITGB2	TTD
	COL1A1	TCMSP		CA3	Binding DB	CFI	TTD
	COL3A1	TCMSP		CA12	Binding DB	ENPP1	TTD
	ACTB	TCMSP		CA4	Binding DB	HMGCR	TTD
	NF1	TCMSP		CA5B	Binding DB	F8	TTD
Protocatechuic acid	NR0B1	STITCH		ACE	Binding DB	F5	TTD
	NR5A1	STITCH		SELL	Binding DB	AGTR1	TCMSP
	MPO	STITCH		SELE	Binding DB	F2R	TCMSP
	DHODH	STITCH		SERPINE1	Binding DB	ITGB2	TCMSP
	ADSL	STITCH		MMP7	Binding DB	SELE	TCMSP
	DPYD	STITCH		MMP2	Binding DB	MAPK10	TCMSP
	AHCY	STITCH		ADAM17	Binding DB	CACNA1A	TCMSP
	COMT	STITCH		ST3GAL1	Binding DB	CASP1	TCMSP
	PTGS1	TCMSP		FUT6	Binding DB	OPRL1	TCMSP
	ALOX5	TCMSP		FUT7	Binding DB	HTR1A	TCMSP
	PTGS2	TCMSP		SELP	Binding DB	PTGIS	TCMSP
	MAOB	TCMSP	Catechin	SLC22A11	STITCH	AKT1	TCMSP
	LYZ	TCMSP		PON1	STITCH	OPRK1	TCMSP
	cobT	TCMSP		APOB	STITCH	RYR1	PharmGKB
	ADH1C	TCMSP		SLC47A1	STITCH	F5	MalaCards
	PRSS3	TCMSP		KIAA1149	STITCH	F2	MalaCards
	PRKCA	TCMSP		BACE1	STITCH	NOS3	MalaCards
	PRKCB	TCMSP		PTGS2	STITCH, TCMSP	ALOX5AP	MalaCards
	PRKCG	TCMSP		CSF2	STITCH, HIT	PRKCH	MalaCards
	MGAM	TCMSP		DNMT1	STITCH	FBN1	MalaCards
	PRKCG	TCMSP		ABCB1	STITCH	ACE	MalaCards
	CA2	Binding DB		SLC35A2	STITCH	PDE4D	MalaCards
	CA14	Binding DB		ENOX2	STITCH	PLAT	MalaCards
	CA1	Binding DB		ZFP36	STITCH	PTGIS	MalaCards
	CA4	Binding DB		HMOX1	STITCH	APOH	MalaCards
	CA12	Binding DB		HMOX2	STITCH	NOTCH3	MalaCards
	CA9	Binding DB		CAT	STITCH, TCMSP	MTHFR	MalaCards
	CA6	Binding DB		NCOA1	STITCH	SERPINC1	MalaCards
	CA7	Binding DB		ARG2	STITCH	SERPINE1	MalaCards
	CTSL	Binding DB		PTGS1	TCMSP	SELP	MalaCards
	FUT7	Binding DB		ESR1	TCMSP	F3	MalaCards
Neochlorogenic acid	PTGS2	TCMSP		LACTB	TCMSP	VWF	MalaCards
	GAA	TCMSP		NCOA2	TCMSP	THBD	MalaCards
Dihydrocaffeic acid	TYR	STITCH		CALM1	TCMSP	SULT1A3	MalaCards
	PTGS1	TCMSP		RXRA	TCMSP	CRP	MalaCards
	F2	TCMSP		HAS2	TCMSP	APOE	MalaCards
	ADRB1	TCMSP		HSP90AA1	TCMSP	PF4	MalaCards
	PTGS2	TCMSP		PRKACA	TCMSP	SERPIND1	MalaCards
	ADRA2A	TCMSP		CA7	Binding DB	HBA1	MalaCards
	ADRA2C	TCMSP		CA2	Binding DB	PLG	MalaCards
	ACHE	TCMSP		CA1	Binding DB	ENTPD1	MalaCards
	ADRA1A	TCMSP		CA3	Binding DB	AGTR1	MalaCards
	ADRB2	TCMSP		CA5B	Binding DB	AIF1	MalaCards
	DPP4	TCMSP		CA5A	Binding DB	PPBP	MalaCards
	LACTB	TCMSP		CA12	Binding DB	BMP7	MalaCards
	MAOB	TCMSP		CA4	Binding DB	ENO2	MalaCards
	MAOA	TCMSP		CA6	Binding DB	GP6	MalaCards
	CTRB1	TCMSP		CA9	Binding DB	COG2	MalaCards
	ADRA1D	TCMSP		CA13	Binding DB	EPHX2	MalaCards
Protocatechuic aldehyde	ADH1C	TCMSP		CA14	Binding DB	LPA	MalaCards
	LYZ	TCMSP		F2	Binding DB	HSPA4	MalaCards
	cobT	TCMSP		DAPK1	Binding DB	REN	MalaCards
	CHRM3	TCMSP		AMY1A	Binding DB	AQP4	MalaCards
	CHRM1	TCMSP		XDH	Binding DB	FGA	MalaCards
	GABRA2	TCMSP		CD38	Binding DB	PROZ	MalaCards
	GABRA3	TCMSP	Chlorogenic acid	PTGS2	TCMSP	APOB	MalaCards
	CHRM2	TCMSP		PTPN1	Binding DB	P2RY12	MalaCards
	GABRA1	TCMSP		HDAC6	Binding DB	PLA2G7	MalaCards
	CHRNA7	TCMSP		AKR1B1	Binding DB	AKT1	MalaCards
	GABRA6	TCMSP		AKR1B10	Binding DB	NES	MalaCards
	ODC1	TCMSP	Hydroxysafflor yellow A	HIF1A	STITCH	NGB	MalaCards
Syringin	PTGS2	TCMSP	Vanillic acid	UGT1A7	STITCH	TSPAN33	MalaCards
	NOS3	TCMSP		UGT1A10	STITCH	MROS	MalaCards
	PTGS1	TCMSP, Binding DB		UGT1A8	STITCH	TLR4	MalaCards
	CHRM3	TCMSP		UGT1A3	STITCH	MAP2	MalaCards
	CHRM1	TCMSP		PTGS2	TCMSP	SLC1A2	MalaCards
	ADRB1	TCMSP		MAOB	TCMSP	ASAH1	MalaCards
	ADRA2A	TCMSP		MAOA	TCMSP	TBXA2R	MalaCards
	SLC6A2	TCMSP		ADRA2A	TCMSP	HMGCR	MalaCards
	ADRA1A	TCMSP		PTGS1	TCMSP	GDNF	MalaCards
	CHRM2	TCMSP		LYZ	TCMSP	F7	MalaCards
	ADRA2B	TCMSP		NOS3	TCMSP	IL6	CTD
	ADRA1B	TCMSP		TYRP1	TCMSP	IL1B	CTD
	SLC6A3	TCMSP		TPMT	Binding DB	NOS3	CTD
	ADRB2	TCMSP	Epicatechin	SLC22A11	STITCH	MMP9	CTD
	GABRA1	TCMSP		PON1	STITCH	SOD2	CTD
	LTA4H	TCMSP		APOB	STITCH	ICAM1	CTD
	MAOB	TCMSP		SLC47A1	STITCH	F2	CTD
	PKIA	TCMSP		KIAA1149	STITCH	CXCL2	CTD
Chlorogenic acid	PTGS2	TCMSP		BACE1	STITCH	NPY	CTD
	PTPN1	Binding DB		PTGS2	STITCH, TCMSP	EDN1	CTD
	HDAC6	Binding DB		CSF2	STITCH	HBA1	CTD
	AKR1B1	Binding DB		DNMT1	STITCH	FOS	CTD
	AKR1B10	Binding DB		ABCB1	STITCH	VDR	CTD
Hydroxysafflor yellow A	HIF1A	STITCH		SLC35A2	STITCH	ATF3	CTD
Ferulic acid	CXCL3	STITCH		ENOX2	STITCH	STAT3	CTD
	CXCL2	STITCH		ZFP36	STITCH	FGF21	CTD
	CXCL1	STITCH		HMOX1	STITCH	IGF1	CTD
	ERVW-1	STITCH		HMOX2	STITCH	SERPINH1	CTD
	CYCS	STITCH		CAT	STITCH	C3	CTD
	TMEM30A	STITCH		NCOA1	STITCH	ADH1B	CTD
	ERVFRD-1	STITCH		ARG2	STITCH	ALOX5AP	CTD
	TMEM30B	STITCH		PTGS1	TCMSP	ALOX5	CTD
	TMEM30C	STITCH		ESR1	TCMSP	IL6ST	CTD
	PTGS1	TCMSP		LACTB	TCMSP	PLD1	CTD
	PTGS2	TCMSP		HSP90AA1	TCMSP	JUNB	CTD
	NOS3	TCMSP		PRKACA	TCMSP	XDH	CTD
	ADRA2A	TCMSP		XDH	Binding DB	HSPD1	CTD
	SLC6A2	TCMSP		CA2	Binding DB	TNFAIP6	CTD
	ADRA1A	TCMSP		CA1	Binding DB	CCL7	CTD
	SLC6A3	TCMSP		CA4	Binding DB	PRKCH	CTD
	ADRB2	TCMSP		CA6	Binding DB	IL11	CTD
	LTA4H	TCMSP		ALPI	Binding DB	IL6R	CTD
	MAOB	TCMSP		ALPL	Binding DB	CXCR2	CTD
	MAOA	TCMSP		ALPPL2	Binding DB	F5	CTD
	CTRB1	TCMSP		MAPK14	Binding DB	IL22	CTD
	PRKACA	TCMSP		MAPK10	Binding DB	GABRA6	CTD
	ADRA2B	TCMSP		PGD	Binding DB	S100A5	CTD
	PLAU	TCMSP		F2	Binding DB	PLAT	CTD
	HSP90AA1	TCMSP		CTSL	Binding DB	CCL2	CTD
	CA2	Binding DB		FASN	Binding DB	P2RY12	DrugBank
	CA1	Binding DB		AMY1A	Binding DB	ADRB1	DrugBank
	CA5A	Binding DB	Rutin	ALDH2	STITCH	PTGS2	DrugBank
	CA7	Binding DB		AKR1C3	STITCH	PTGS1	DrugBank
	CA6	Binding DB		SREBF1	STITCH	PTGS2	DrugBank
	CA14	Binding DB		FGF2	STITCH	VKORC1	DrugBank
	CA12	Binding DB		EGFR	STITCH	ADRA1A	DrugBank
	CA9	Binding DB		CTGF	STITCH	PDE10A	DrugBank
	CA5B	Binding DB		TMPRSS11D	STITCH	ADORA1	DrugBank
	CA4	Binding DB		GSR	STITCH	ACE	DrugBank
	CA3	Binding DB		P4HB	STITCH	HTR4	DrugBank
	HYAL1	Binding DB		PRNP	STITCH	SLC6A2	DrugBank
Caffeic acid	SLC22A6	STITCH		TGM4	STITCH	F2	DrugBank
	COMT	STITCH		CASP7	STITCH	ACE	DrugBank
	SLC22A8	STITCH		CASP3	STITCH	ADRB1	DrugBank
	SLC22A7	STITCH		NOS1	STITCH	PTGS2	DrugBank
	CAT	STITCH		ADRA2A	STITCH	PTGS2	DrugBank
	TYR	STITCH		ADRA2C	STITCH	SLC6A2	DrugBank
	PTGS1	TCMSP, Binding DB		CXCL10	STITCH	PTGIR	DrugBank
	ADRB1	TCMSP		IL8	STITCH	SLC6A2	DrugBank
	PTGS2	TCMSP, Binding DB		POR	STITCH	P2RY12	DrugBank
	ADRA2A	TCMSP		CHRM5	STITCH	PTGS1	DrugBank
	ADRA2C	TCMSP		CAT	STITCH	SERPINC1	DrugBank
	ADRB2	TCMSP		ACHE	STITCH	AOC3	DrugBank
	MAOB	TCMSP		MTRR	STITCH	SLC12A1	DrugBank
	CTRB1	TCMSP		NOS3	STITCH	ADRB2	DrugBank
	SLC6A3	TCMSP		NOS2	STITCH	NFKB1	DrugBank
	AKR1B1	TCMSP, Binding DB		ARNT	STITCH	ELN	DrugBank
	PLAU	TCMSP		AHR	STITCH	ADRA2A	DrugBank
	MAOA	TCMSP		CYP1B1	STITCH	ADA	DrugBank
	LYZ	TCMSP		FOXC1	STITCH	ADORA2A	DrugBank
	ADRA1A	TCMSP		ITGB5	STITCH	HTR2B	DrugBank
	ADRA1D	TCMSP		FOXC2	STITCH	SLC6A4	DrugBank
	TNF	TCMSP		ITGB3	STITCH	ADRB2	DrugBank
	CYP1A1	TCMSP		MAPK1	STITCH	PTGS1	DrugBank
	PRKCB	TCMSP		MAPK3	STITCH	PTGS1	DrugBank
	BTK	TCMSP		CCL2	STITCH	PPARD	DrugBank
	GFAP	TCMSP		TOP2A	TCMSP	PTGIR	DrugBank
	IGF2	TCMSP		RELA	TCMSP	PTGS2	DrugBank
	SELP	TCMSP		TNF	TCMSP	F10	DrugBank
	RAC1	TCMSP		IL6	TCMSP	P4HA1	DrugBank
	EGFR	Binding DB		CASP3	TCMSP	FADS2	DrugBank
	MMP9	Binding DB		POR	TCMSP	CA1	DrugBank
	MMP2	Binding DB		SOD1	TCMSP	NOS2A	DrugBank
	MMP1	Binding DB		CAT	TCMSP	DRD1	DrugBank
	PTPN1	Binding DB		IL1B	TCMSP	PDE5A	DrugBank
	ALOX5	Binding DB		CXCL8	TCMSP	ADORA2B	DrugBank
	HSP90AA1	Binding DB		PRKCB	TCMSP	HTR2C	DrugBank
	AKR1B10	Binding DB		ALOX5	TCMSP	SLC6A3	DrugBank
	DUSP3	Binding DB		HMGCR	TCMSP	ADRA1A	DrugBank
	PTPN7	Binding DB		HAS2	TCMSP	RXRA	DrugBank
	HYAL1	Binding DB		GSTP1	TCMSP	P2RY12	DrugBank
	ACHE	Binding DB		DIO1	TCMSP	PTGIS	DrugBank
	TTR	Binding DB		C5AR1	TCMSP	SELP	DrugBank
	CA12	Binding DB		INS	TCMSP	CYP3A4	DrugBank
	CA14	Binding DB		FCER2	TCMSP	SLC8A1	DrugBank
	CA9	Binding DB		ITGB2	TCMSP	CA2	DrugBank
	CA7	Binding DB		TBXA2R	TCMSP	PDE10A	DrugBank
	CA6	Binding DB		PLAU	Binding DB	ADRB1	DrugBank
	CA5B	Binding DB	Paeoniflorin	TNF	TCMSP	PDE4A	DrugBank
	CA5A	Binding DB		IL6	TCMSP	HTR2A	DrugBank
	CA4	Binding DB		CD14	TCMSP	ADRA1B	DrugBank
	CA3	Binding DB		LBP	TCMSP	ELOVL4	DrugBank
	CA2	Binding DB	Ferulic acid	CXCL3	STITCH	CA9	DrugBank
	CA1	Binding DB		CXCL2	STITCH	CA12	DrugBank
Sweroside	NQO2	TCMSP		CXCL1	STITCH	ATP1A1	DrugBank
	CA2	TCMSP		ERVW-1	STITCH	KCNMA1	DrugBank
	GABRA2	TCMSP		CYCS	STITCH	TRPV1	DrugBank
	GABRA1	TCMSP		TMEM30A	STITCH	CA4	DrugBank
	PRSS1	TCMSP		ERVFRD-1	STITCH	F5	OMIM
	PTGS2	TCMSP		TMEM30B	STITCH	RPRGL1	OMIM
	DPP4	TCMSP		TMEM30C	STITCH	PDE4D	OMIM
Morroniside	CA2	TCMSP		PTGS1	TCMSP	PDE4D	OMIM
	DPP4	TCMSP		PTGS2	TCMSP	NOS3	OMIM
p-Coumaric acid	TMEM37	STITCH		NOS3	TCMSP	F2	OMIM
	PTGS1	TCMSP		ADRA2A	TCMSP	ALOX5AP	OMIM
	PTGS2	TCMSP		SLC6A2	TCMSP	COL4A2	OMIM
	MAOB	TCMSP		ADRA1A	TCMSP	ACE	OMIM
	MAOA	TCMSP		SLC6A3	TCMSP	P2RY12	OMIM
	LYZ	TCMSP		ADRB2	TCMSP	ADRB1	OMIM
	CTRB1	TCMSP		LTA4H	TCMSP	PTGS2	OMIM
	PLA2G2E	TCMSP		MAOB	TCMSP	PTGS1	OMIM
	NOS3	TCMSP		MAOA	TCMSP	VKORC1	OMIM
	TYR	TCMSP		CTRB1	TCMSP	ADRA1A	OMIM
	CCL16	TCMSP		PRKACA	TCMSP	PDE10A	OMIM
	EGFR	Binding DB		ADRA2B	TCMSP	ADORA1	OMIM
	CA1	Binding DB		PLAU	TCMSP	ACE	OMIM
	CA2	Binding DB		HSP90AA1	TCMSP	HTR4	OMIM
	PTPN1	Binding DB		CA2	Binding DB	SLC6A2	OMIM
	AKR1B10	Binding DB		CA1	Binding DB	F2	OMIM
	CA12	Binding DB		CA5A	Binding DB	PTGIR	OMIM
	CA14	Binding DB		CA7	Binding DB	SERPINC1	OMIM
	HCAR2	Binding DB		CA6	Binding DB	AOC3	OMIM
	AKR1B1	Binding DB		CA14	Binding DB	SLC12A1	OMIM
	CA9	Binding DB		CA12	Binding DB	ADRB2	OMIM
	CA7	Binding DB		CA9	Binding DB	NFKB1	OMIM
	CA6	Binding DB		CA5B	Binding DB	ELN	OMIM
	CA5B	Binding DB		CA4	Binding DB	ADRA2A	OMIM
	CA5A	Binding DB		CA3	Binding DB	ADA	OMIM
	CA4	Binding DB		HYAL1	Binding DB	ADORA2A	OMIM
	CA3	Binding DB	Calycosin-7-O-glucoside	F2	TCMSP	HTR2B	OMIM
Eriocitrin	TFAM	STITCH		PTGS2	TCMSP	SLC6A4	OMIM
Rutin	ALDH2	STITCH		PTPN1	TCMSP	PPARD	OMIM
	AKR1C3	STITCH		CDK2	TCMSP	F10	OMIM
	SREBF1	STITCH		PRSS1	TCMSP	P4HA1	OMIM
	FGF2	STITCH	Kaempferol-3-O-rutinoside	SOD1	TCMSP	FADS2	OMIM
	EGFR	STITCH		TOP2A	TCMSP	CA1	OMIM
	CTGF	STITCH	Biochanin A	ABCC1	STITCH	NOS2A	OMIM
	TMPRSS11D	STITCH		MMP9	STITCH	DRD1	OMIM
	GSR	STITCH		CYP19A1	STITCH	PDE5A	OMIM
	P4HB	STITCH		CYP1A1	STITCH	ADORA2B	OMIM
	PRNP	STITCH		UGT1A7	STITCH	HTR2C	OMIM
	TGM4	STITCH		UGT1A9	STITCH	SLC6A3	OMIM
	CASP7	STITCH		UGT1A8	STITCH	RXRA	OMIM
	CASP3	STITCH		CYP1B1	STITCH	PTGIS	OMIM
	NOS1	STITCH		PARP1	STITCH	SELP	OMIM
	ADRA2A	STITCH		APOA1	STITCH	CYP3A4	OMIM
	ADRA2C	STITCH		CASP3	STITCH	SLC8A1	OMIM
	CXCL10	STITCH		MAPK12	STITCH	CA2	OMIM
	IL8	STITCH		MAPK11	STITCH	PDE4A	OMIM
	POR	STITCH		MAPK14	STITCH	HTR2A	OMIM
	CHRM5	STITCH		MMP2	STITCH	ADRA1B	OMIM
	CAT	STITCH		UGT1A1	STITCH	ELOVL4	OMIM
	ACHE	STITCH		UGT1A10	STITCH	CA9	OMIM
	MTRR	STITCH		CYP1A2	STITCH	CA12	OMIM
	NOS3	STITCH		CYP27B1	STITCH	ATP1A1	OMIM
	NOS2	STITCH		CKB	STITCH	KCNMA1	OMIM
	ARNT	STITCH		MAPK6	STITCH	TRPV1	OMIM
	AHR	STITCH		MAPK15	STITCH	CA4	OMIM
	CYP1B1	STITCH		MAPK4	STITCH
	FOXC1	STITCH		MAPK7	STITCH
	ITGB5	STITCH		MAPK1	STITCH
	FOXC2	STITCH		MAPK3	STITCH
	ITGB3	STITCH		MAPK13	STITCH
	MAPK1	STITCH		NOS2	TCMSP
	MAPK3	STITCH		PTGS1	TCMSP
	CCL2	STITCH		ESR1	TCMSP
	TOP2A	TCMSP		AR	TCMSP
	RELA	TCMSP		PPARG	TCMSP
	TNF	TCMSP		PTGS2	TCMSP
	IL6	TCMSP		RXRA	TCMSP
	CASP3	TCMSP		ADRB2	TCMSP
	POR	TCMSP		ESR2	TCMSP
	SOD1	TCMSP		DPP4	TCMSP
	CAT	TCMSP		MAPK14	TCMSP
	IL1B	TCMSP		GSK3B	TCMSP
	CXCL8	TCMSP		HSP90AA1	TCMSP
	PRKCB	TCMSP		CDK2	TCMSP
	ALOX5	TCMSP		CHEK1	TCMSP
	HMGCR	TCMSP		PRKACA	TCMSP
	HAS2	TCMSP		IGHG1	TCMSP
	GSTP1	TCMSP		PRSS1	TCMSP
	DIO1	TCMSP		PIM1	TCMSP
	C5AR1	TCMSP		CCNA2	TCMSP
	INS	TCMSP		NCOA2	TCMSP
	FCER2	TCMSP		NCOA1	TCMSP
	ITGB2	TCMSP		CALM1	TCMSP
	TBXA2R	TCMSP		SCN5A	TCMSP
	PLAU	Binding DB		PDE3A	TCMSP
Salvianolic acid J	F7	TCMSP		CA12	Binding DB
	PTPN1	TCMSP		CA7	Binding DB
	PRSS1	TCMSP		CBR1	Binding DB
Kaempferol-3-O-rutinoside	SOD1	TCMSP		CA4	Binding DB
	TOP2A	TCMSP		CA1	Binding DB
Safflor yellow A	PTGS2	TCMSP		CA2	Binding DB
	DPP4	TCMSP		CYP19A1	Binding DB
	PRSS1	TCMSP		HSD17B3	Binding DB
Salvianolic acid D	PTGS2	TCMSP		RELA	Binding DB
	PRSS1	TCMSP		DRD5	Binding DB
	F2	TCMSP		EGFR	Binding DB
	F10	TCMSP		AR	Binding DB
Salvianolic acid G	PTGS2	TCMSP		HSD17B2	Binding DB
Rosmarinic acid	ESR1	TCMSP		STAT3	Binding DB
	F2	TCMSP	Salvianolic acid B	CA7	Binding DB
	AR	TCMSP		CA4	Binding DB
	PPARG	TCMSP		CA12	Binding DB
	PTGS2	TCMSP		CA2	Binding DB
	DPP4	TCMSP		CA1	Binding DB
	PRSS1	TCMSP		LCK	Binding DB
	RELA	TCMSP		SRC	Binding DB
	IKBKB	TCMSP	Ononin	NOS2	TCMSP
	CDKN1A	TCMSP		F2	TCMSP
	EIF6	TCMSP		ESR1	TCMSP
	MAPK1	TCMSP		AR	TCMSP
	CASP3	TCMSP		PTGS2	TCMSP
	STAT1	TCMSP		F7	TCMSP
	CCL2	TCMSP		KDR	TCMSP
	MGAM	TCMSP		DPP4	TCMSP
	IL2	TCMSP		CALM1	TCMSP
	NFATC3	TCMSP		PPARG	TCMSP
	CCND3	TCMSP		ALDH2	Binding DB
	IL4	TCMSP		IL2	Binding DB
	IL5	TCMSP	Calycosin	UGT1A8	STITCH
	CCL3	TCMSP		UGT1A3	STITCH
	CD80	TCMSP		UGT1A9	STITCH
	CD86	TCMSP		UGT1A7	STITCH
	CCL11	TCMSP		UGT1A1	STITCH
	CCR3	TCMSP		UGT1A10	STITCH
	IDO1	TCMSP		BLVRB	STITCH
	SNCA	TCMSP		UGT2B7	STITCH
	IGHG1	TCMSP		MAPK3	STITCH
	CD247	TCMSP		HMGB1	STITCH
	C3	TCMSP		MAPK1	STITCH
	F2	TCMSP		NOS2	TCMSP
	C5	TCMSP		PTGS1	TCMSP
	FYN	Binding DB		ESR1	TCMSP
	HYAL1	Binding DB		AR	TCMSP
	AKR1B1	Binding DB		PPARG	TCMSP
	MCL1	Binding DB		PTGS2	TCMSP
	SRC	Binding DB		RXRA	TCMSP
	LCK	Binding DB		PDE3A	TCMSP
	MMP1	Binding DB		ESR2	TCMSP
	JUN	Binding DB		DPP4	TCMSP
	TTR	Binding DB		MAPK14	TCMSP
	ACHE	Binding DB		GSK3B	TCMSP
	PSIP1	Binding DB		CDK2	TCMSP
Lithospermic acid	PRSS1	TCMSP		CHEK1	TCMSP
	XDH	TCMSP		PRSS1	TCMSP
	CA12	Binding DB		PIM1	TCMSP
	CA4	Binding DB		CCNA2	TCMSP
	CA7	Binding DB		NCOA2	TCMSP
	CA1	Binding DB		CALM1	TCMSP
	CA2	Binding DB		ADRB2	TCMSP
Salvianolic acid B	CA7	Binding DB		HSP90AA1	TCMSP
	CA4	Binding DB		PRKACA	TCMSP
	CA12	Binding DB	Formononetin	UGT1A1	STITCH
	CA2	Binding DB		UGT1A8	STITCH
	CA1	Binding DB		UGT1A9	STITCH
	LCK	Binding DB		UGT1A10	STITCH
	SRC	Binding DB		UGT1A7	STITCH
Salvianolic acid A	F7	TCMSP		CYP1A1	STITCH
	F10	TCMSP		CASP8	STITCH
	PTPN1	TCMSP		CASP9	STITCH
	PRSS1	TCMSP		CASP3	STITCH
	AKT1	TCMSP		PDE4A	STITCH
	CCND1	TCMSP		CYP1B1	STITCH
	BCL2	TCMSP		NOS2	TCMSP
	CDKN1A	TCMSP		PTGS1	TCMSP
	EIF6	TCMSP		CHRM1	TCMSP
	CASP3	TCMSP		ESR1	TCMSP
	HERC5	TCMSP		AR	TCMSP
	COL7A1	TCMSP		PPARG	TCMSP
Salvianolic acid C	PRSS1	TCMSP		PTGS2	TCMSP
	F2	TCMSP		RXRA	TCMSP
				PDE3A	TCMSP
				ADRA1A	TCMSP
				SLC6A3	TCMSP
				ADRB2	TCMSP
				SLC6A4	TCMSP
				ESR2	TCMSP
				DPP4	TCMSP
				MAPK14	TCMSP
				GSK3B	TCMSP
				CDK2	TCMSP
				MAOB	TCMSP
				CHEK1	TCMSP
				PRSS1	TCMSP
				PIM1	TCMSP
				CCNA2	TCMSP
				CALM1	TCMSP
				PKIA	TCMSP
				NOS3	TCMSP
				ACHE	TCMSP
				LACTB	TCMSP
				JUN	TCMSP
				IL4	TCMSP
				SIRT1	TCMSP
				ATP5F1B	TCMSP
				MT-ND6	TCMSP
				HSD3B2	TCMSP
				HSD3B1	TCMSP
				HSP90AA1	TCMSP
				PRKACA	TCMSP
				F2	TCMSP
				IL2	Binding DB
			Senkyunolide A	PTGS2	TCMSP
				NOS3	TCMSP
				GABRA2	TCMSP
				SLC6A2	TCMSP
				GABRA1	TCMSP
				GRIA2	TCMSP
				GABRA3	TCMSP
				GABRA6	TCMSP
			Tanshinone II-B	CHRM1	TCMSP
				SCN5A	TCMSP
				PTGS2	TCMSP
				OPRD1	TCMSP
				ACHE	TCMSP
				ADRA1A	TCMSP
				ADRB2	TCMSP
				OPRM1	TCMSP
				DPP4	TCMSP
				CHRNA7	TCMSP
				PRSS1	TCMSP
				NCOA1	TCMSP
				F2	TCMSP
			Z-Butylidenephthalide	PTGS1	TSMSP
				CHRM3	TSMSP
				CHRM1	TSMSP
				ADRB1	TSMSP
				SCN5A	TSMSP
				PTGS2	TSMSP
				ADRA2A	TSMSP
				ADRA2C	TSMSP
				PDE3A	TSMSP
				HTR2A	TSMSP
				SLC6A2	TSMSP
				ADRA1A	TSMSP
				CHRM2	TSMSP
				ADRA2B	TSMSP
				ADRA1B	TSMSP
				SLC6A3	TSMSP
				ADRB2	TSMSP
				SLC6A4	TSMSP
				GABRA1	TSMSP
				MAOB	TSMSP
				MAOA	TSMSP
				PRKACA	TSMSP
				RXRA	TSMSP
				PKIA	TSMSP
				HTR7	Binding DB
				TRPA1	Binding DB
			(E)-ligustilide	PTGS2	TCMSP
				GABRA1	TCMSP
			(Z)-ligustilide	PTGS2	TCMSP
				GABRA1	TCMSP
				TRPA1	Binding DB
			Cryptotanshinone	BCHE	STITCH
				ACHE	STITCH
				EDN1	STITCH, TCMSP
				STAT3	STITCH, TCMSP
				IL12A	STITCH
				IL12B	STITCH
				NR1I2	STITCH
				PTGS1	TCMSP
				DRD1	TCMSP
				CHRM3	TCMSP
				CHRM1	TCMSP
				SCN5A	TCMSP
				CHRM5	TCMSP
				PTGS2	TCMSP
				CA2	TCMSP
				CHRM4	TCMSP
				OPRD1	TCMSP
				ADRA1A	TCMSP
				CHRM2	TCMSP
				ADRA1B	TCMSP
				ADRB2	TCMSP
				ADRA1D	TCMSP
				TOP2A	TCMSP
				OPRM1	TCMSP
				CHRNA7	TCMSP
				NCOA2	TCMSP
				NCOA1	TCMSP
				PGR	TCMSP
				GABRA1	TCMSP
				RELA	TCMSP
				CCND1	TCMSP
				BCL2L1	TCMSP
				TNF	TCMSP
				APP	TCMSP
				BIRC5	TCMSP
			Tanshinone IIA	MMP2	STITCH
				ATF3	STITCH
				CCND1	STITCH
				EDN1	STITCH, TCMSP
				NR0B2	STITCH
				CES2	STITCH
				HMGB2	STITCH
				HMGB1	STITCH
				PTPN3	STITCH
				DRD1	TCMSP
				CHRM3	TCMSP
				F2	TCMSP
				CHRM1	TCMSP
				SCN5A	TCMSP
				CHRM5	TCMSP
				PTGS2	TCMSP
				CHRM4	TCMSP
				OPRD1	TCMSP
				ACHE	TCMSP
				ADRA1A	TCMSP
				CHRM2	TCMSP
				ADRB2	TCMSP
				OPRM1	TCMSP
				DPP4	TCMSP
				CHRNA7	TCMSP
				NCOA1	TCMSP
				RXRA	TCMSP
				RELA	TCMSP
				BCL2	TCMSP
				FOS	TCMSP
				CDKN1A	TCMSP
				MMP9	TCMSP
				JUN	TCMSP
				AHSA1	TCMSP
				CASP3	TCMSP
				TP53	TCMSP
				NFKBIA	TCMSP
				FASN	TCMSP
				EDNRA	TCMSP
				CYP3A4	TCMSP
				CYP1A2	TCMSP
				MYC	TCMSP
				CYP1A1	TCMSP
				NR1I2	TCMSP
				NPM1	TCMSP
				ECE1	TCMSP
				PARP4	TCMSP
				CALCR	TCMSP
				ITGB3	TCMSP
			Caffeic acid	SLC22A6	STITCH
				COMT	STITCH
				SLC22A8	STITCH
				SLC22A7	STITCH
				CAT	STITCH
				TYR	STITCH
				PTGS1	TCMSP, Binding DB
				ADRB1	TCMSP
				PTGS2	TCMSP, Binding DB
				ADRA2A	TCMSP
				ADRA2C	TCMSP
				ADRB2	TCMSP
				MAOB	TCMSP
				CTRB1	TCMSP
				SLC6A3	TCMSP
				AKR1B1	TCMSP, Binding DB
				PLAU	TCMSP
				MAOA	TCMSP
				LYZ	TCMSP
				ADRA1A	TCMSP
				ADRA1D	TCMSP
				TNF	TCMSP
				CYP1A1	TCMSP
				PRKCB	TCMSP
				BTK	TCMSP
				GFAP	TCMSP
				IGF2	TCMSP
				SELP	TCMSP
				RAC1	TCMSP
				EGFR	Binding DB
				MMP9	Binding DB
				MMP2	Binding DB
				MMP1	Binding DB
				PTPN1	Binding DB
				ALOX5	Binding DB
				HSP90AA1	Binding DB
				AKR1B10	Binding DB
				DUSP3	Binding DB
				PTPN7	Binding DB
				HYAL1	Binding DB
				ACHE	Binding DB
				TTR	Binding DB
				CA12	Binding DB
				CA14	Binding DB
				CA9	Binding DB
				CA7	Binding DB
				CA6	Binding DB
				CA5B	Binding DB
				CA5A	Binding DB
				CA4	Binding DB
				CA3	Binding DB
				CA2	Binding DB
				CA1	Binding DB
			Amygdalin	PTGS1	TCMSP
				PTGS2	TCMSP
				HSP90AA1	TCMSP
				PIK3CG	TCMSP
				PRKACA	TCMSP
				NCOA2	TCMSP
				CALM1	TCMSP
			Rosmarinic acid	ESR1	TCMSP
				F2	TCMSP
				AR	TCMSP
				PPARG	TCMSP
				PTGS2	TCMSP
				DPP4	TCMSP
				PRSS1	TCMSP
				RELA	TCMSP
				IKBKB	TCMSP
				CDKN1A	TCMSP
				EIF6	TCMSP
				MAPK1	TCMSP
				CASP3	TCMSP
				STAT1	TCMSP
				CCL2	TCMSP
				MGAM	TCMSP
				IL2	TCMSP
				NFATC3	TCMSP
				CCND3	TCMSP
				IL4	TCMSP
				IL5	TCMSP
				CCL3	TCMSP
				CD80	TCMSP
				CD86	TCMSP
				CCL11	TCMSP
				CCR3	TCMSP
				IDO1	TCMSP
				SNCA	TCMSP
				IGHG1	TCMSP
				CD247	TCMSP
				C3	TCMSP
				F2	TCMSP
				C5	TCMSP
				FYN	Binding DB
				HYAL1	Binding DB
				AKR1B1	Binding DB
				MCL1	Binding DB
				SRC	Binding DB
				LCK	Binding DB
				MMP1	Binding DB
				JUN	Binding DB
				TTR	Binding DB
				ACHE	Binding DB
				PSIP1	Binding DB
			Lithospermic acid	PRSS1	TCMSP
				XDH	TCMSP
				CA12	Binding DB
				CA4	Binding DB
				CA7	Binding DB
				CA1	Binding DB
				CA2	Binding DB
			Wogonin	KCNK10	STITCH
				PLSCR1	STITCH
				HMGB1	STITCH
				PTGS2	STITCH, TCMSP, Binding DB
				MMP9	STITCH
				CCL2	STITCH, TCMSP
				MYC	STITCH
				MCL1	STITCH, TCMSP
				CDK9	STITCH
				GATA1	STITCH
				TMPRSS11D	STITCH
				MDK	STITCH
				CASP3	STITCH, TCMSP
				MAPK1	STITCH
				MAPK3	STITCH
				KRAS	STITCH
				MUC5B	STITCH
				MUC5AC	STITCH
				CCL17	STITCH
				HMOX1	STITCH
				NOS2	TCMSP
				PTGS1	TCMSP
				ESR1	TCMSP
				AR	TCMSP
				SCN5A	TCMSP
				PPARG	TCMSP
				RXRA	TCMSP
				PDE3A	TCMSP
				DPP4	TCMSP
				MAPK14	TCMSP
				GSK3B	TCMSP
				HSP90AA1	TCMSP
				CDK2	TCMSP
				PIK3CG	TCMSP
				CHEK1	TCMSP
				PRKACA	TCMSP
				PRSS1	TCMSP
				CALM1	TCMSP
				ADRB2	TCMSP
				GABRA1	TCMSP
				RELA	TCMSP
				AKT1	TCMSP
				CCND1	TCMSP
				BCL2	TCMSP
				CDKN1A	TCMSP
				EIF6	TCMSP
				BAX	TCMSP
				CASP9	TCMSP
				KDR	TCMSP
				TNF	TCMSP
				JUN	TCMSP
				IL6	TCMSP
				AHSA1	TCMSP
				TP53	TCMSP
				BBC3	TCMSP
				TEP1	TCMSP
				MMP1	TCMSP
				PRKCD	TCMSP
				PTGER3	TCMSP
				FN1	TCMSP
				CXCL8	TCMSP
				HTR7	Binding DB
			Senkyunolide H	PTGS1	TCMSP
				PTGS2	TCMSP
				GABRA1	TCMSP
				GRIA2	TCMSP
				GABRA6	TCMSP
			Neocnidilide	PTGS2	TCMSP
				GABRA2	TCMSP
				GABRA5	TCMSP
				SLC6A2	TCMSP
				GABRA3	TCMSP
				GABRA1	TCMSP
				GRIA2	TCMSP
				GABRA6	TCMSP
			Mulberrin	F2	TCMSP
				AR	TCMSP
				PPARG	TCMSP
				F10	TCMSP
				PTGS2	TCMSP
				CA2	TCMSP
				F7	TCMSP
				KDR	TCMSP
				TOP2A	TCMSP
				HSP90AA1	TCMSP
				PRSS1	TCMSP
				NCOA2	TCMSP
				CALM1	TCMSP
			Sugiol	CHRM3	TCMSP
				CHRM1	TCMSP
				SCN5A	TCMSP
				CHRM5	TCMSP
				PTGS2	TCMSP
				CA2	TCMSP
				CHRM4	TCMSP
				OPRD1	TCMSP
				ACHE	TCMSP
				ADRA1A	TCMSP
				CHRM2	TCMSP
				ADRA1B	TCMSP
				ADRB2	TCMSP
				ADRA1D	TCMSP
				DRD2	TCMSP
				OPRM1	TCMSP
				CHRNA7	TCMSP
			Lindestrene	DRD1	TCMSP
				CHRM3	TCMSP
				F2	TCMSP
				CHRM1	TCMSP
				ADRB1	TCMSP
				SCN5A	TCMSP
				CHRM4	TCMSP
				SLC6A2	TCMSP
				ADRA1A	TCMSP
				CHRM2	TCMSP
				ADRA1B	TCMSP
				SLC6A3	TCMSP
				ADRB2	TCMSP
				GABRA1	TCMSP
				CHRNA7	TCMSP
			(z)-9-Octadecenamide	FAAH	STITCH
				CNR1	STITCH
				FAAH2	STITCH
				HTR7	STITCH
				GJA1	STITCH
				QRSL1	STITCH
				DCN	STITCH
				HTR2A	STITCH
				PTGS1	TCMSP
				NCOA2	TCMSP
				PTGS2	TCMSP
			Senkyunolide B	PTGS1	TCMSP
				CHRM1	TCMSP
				PTGS2	TCMSP
				SLC6A2	TCMSP
				ADRA2B	TCMSP
				ADRB2	TCMSP
				SLC6A4	TCMSP
				GABRA1	TCMSP
				MAOB	TCMSP
				PRKACA	TCMSP
			Senkyunolide C	PTGS1	TCMSP
				CHRM1	TCMSP
				PTGS2	TCMSP
				CHRM2	TCMSP
				ADRA2B	TCMSP
				ADRB2	TCMSP
				SLC6A4	TCMSP
				GABRA1	TCMSP
				MAOB	TCMSP
				PRKACA	TCMSP
				PKIA	TCMSP
			7-Hydroxycoumarin	UGT2B15	STITCH
				SULT1A1	STITCH
				TMPRSS11D	STITCH
				OXSM	STITCH
				MPO	STITCH
				CYP2A13	STITCH
				CYP2A6	STITCH
				UGT1A9	STITCH
				CYP2A7	STITCH
				CCND1	STITCH
				CYP2D6	STITCH
				PTGS1	TCMSP
				F2	TCMSP
				PTGS2	TCMSP
				ADRA2A	TCMSP
				ADRA2C	TCMSP
				MAOB	TCMSP
				MAOA	TCMSP
				ADRA2B	TCMSP
				LTA4H	TCMSP
				CTSD	TCMSP
			Pratensein	NOS2	TCMSP
				PTGS1	TCMSP
				ESR1	TCMSP
				AR	TCMSP
				PPARG	TCMSP
				PTGS2	TCMSP
				ESR2	TCMSP
				DPP4	TCMSP
				MAPK14	TCMSP
				GSK3B	TCMSP
				HSP90AA1	TCMSP
				CDK2	TCMSP
				CHEK1	TCMSP
				PRKACA	TCMSP
				PRSS1	TCMSP
				PIM1	TCMSP
				CCNA2	TCMSP
				NCOA2	TCMSP
				CALM1	TCMSP
			Methyl tanshinonate	CHRM3	TCMSP
				F2	TCMSP
				AR	TCMSP
				SCN5A	TCMSP
				CHRM5	TCMSP
				PTGS2	TCMSP
				RXRA	TCMSP
				OPRD1	TCMSP
				ACHE	TCMSP
				HTR2A	TCMSP
				ADRB2	TCMSP
				OPRM1	TCMSP
				DPP4	TCMSP
				PRSS1	TCMSP
				NCOA1	TCMSP
			Hydroxytanshinone IIA	CHRM1	TCMSP
				F2	TCMSP
				SCN5A	TCMSP
				CHRM5	TCMSP
				PTGS2	TCMSP
				OPRD1	TCMSP
				ACHE	TCMSP
				ADRB2	TCMSP
				OPRM1	TCMSP
				DPP4	TCMSP
				CHRNA7	TCMSP
				PRSS1	TCMSP
				NCOA1	TCMSP
			Kumatakenin	DAK	STITCH
				SLC25A26	STITCH
				NOS2	TCMSP
				PTGS1	TCMSP
				AR	TCMSP
				SCN5A	TCMSP
				PTGS2	TCMSP
				ESR2	TCMSP
				DPP4	TCMSP
				HSP90AA1	TCMSP
				CDK2	TCMSP
				CHEK1	TCMSP
				PRSS1	TCMSP
				NCOA2	TCMSP
				CALM1	TCMSP
			Trijuganone B	PTGS1	TCMSP
				CHRM3	TCMSP
				CHRM1	TCMSP
				SCN5A	TCMSP
				CHRM5	TCMSP
				PTGS2	TCMSP
				HTR3A	TCMSP
				CA2	TCMSP
				CHRM4	TCMSP
				RXRA	TCMSP
				OPRD1	TCMSP
				PDE3A	TCMSP
				ADRA1A	TCMSP
				CHRM2	TCMSP
				ADRA1B	TCMSP
				SLC6A3	TCMSP
				ADRB2	TCMSP
				ADRA1D	TCMSP
				TOP2A	TCMSP
				OPRM1	TCMSP
				GABRA1	TCMSP
				HSP90AA1	TCMSP
				CHRNA7	TCMSP
				NCOA2	TCMSP
				NCOA1	TCMSP
				DRD1	TCMSP
				HTR2A	TCMSP
				HTR2A	TCMSP
				SLC6A4	TCMSP
				IGHG1	TCMSP
			Carthamidin	PTGS1	TCMSP
				PTGS2	TCMSP
				HSP90AA1	TCMSP
				PRKACA	TCMSP
			Acetyl-11-keto-β-boswellic acid	TOP2A	STITCH
				PARP1	STITCH
				TOP1	STITCH
				VEGFA	STITCH
				HMOX1	STITCH
				SRC	STITCH
				ALOX5	STITCH
				PTGES	Binding DB
				PREP	Binding DB
				ALOX5	Binding DB
			Scopolin	PTGS2	TCMSP
				CA2	TCMSP
				PTPN1	TCMSP
				CA12	Binding DB
				CA1	Binding DB
				CA13	Binding DB
				CA9	Binding DB
				CA7	Binding DB
				CA2	Binding DB
			Daidzoside	GCG	STITCH
				BCHE	STITCH
				ALDH2	STITCH
				ALDH3A2	STITCH
				ACHE	STITCH
				ALDH3A1	STITCH
				GSTA2	STITCH
				GSTA3	STITCH
				GSTA5	STITCH
				GSTA1	STITCH
				HPGDS	STITCH
				GSTP1	STITCH
				GSTA4	STITCH
				F2	TCMSP
				AR	TCMSP
				PTGS2	TCMSP
				DPP4	TCMSP
				CALM1	TCMSP
				ESR1	TCMSP
				PPARG	TCMSP
				F10	TCMSP
				F7	TCMSP
				KDR	TCMSP
				GSK3B	TCMSP
				ACHE	TCMSP
				MAOA	TCMSP
				ALDH2	TCMSP
			Ecdysterone	SOD1	TCMSP
			Ethyl gallate	PTGS1	TCMSP
				PTGS2	TCMSP
				ADRB2	TCMSP
				MAOB	TCMSP
				MAOA	TCMSP
			Luteolin	CDK2	STITCH
				CCNA2	STITCH
				JUN	STITCH
				AKT1	STITCH
				MMP9	STITCH
				MAPK8	STITCH
				SMAD2	STITCH
				CASP3	STITCH
				FOS	STITCH
				EGFR	STITCH
				CYP1B1	STITCH
				TOP1	STITCH
				EZH2	STITCH
				TP53	STITCH
				PPARG	STITCH
				FOXO1	STITCH
				VEGFA	STITCH
				HMOX1	STITCH
				MTOR	STITCH
				BCL2L1	STITCH
				PTGS1	TCMSP
				AR	TCMSP
				PTGS2	TCMSP
				HSP90AA1	TCMSP
				PRSS1	TCMSP
				NCOA2	TCMSP
				PRKACA	TCMSP
				DPP4	TCMSP
				PIK3CG	TCMSP
				RELA	TCMSP
				EGFR	TCMSP
				AKT1	TCMSP
				VEGFA	TCMSP
				CCND1	TCMSP
				BCL2L1	TCMSP
				CDKN1A	TCMSP
				CASP9	TCMSP
				MMP2	TCMSP
				MMP9	TCMSP
				MAPK1	TCMSP
				IL10	TCMSP
				RB1	TCMSP
				CDK4	TCMSP
				TNF	TCMSP
				JUN	TCMSP
				IL6	TCMSP
				CASP3	TCMSP
				TP53	TCMSP
				NFKBIA	TCMSP
				XDH	TCMSP
				TOP1	TCMSP
				MDM2	TCMSP
				APP	TCMSP
				MMP1	TCMSP
				PCNA	TCMSP
				ERBB2	TCMSP
				PPARG	TCMSP
				HMOX1	TCMSP
				CASP7	TCMSP
				ICAM1	TCMSP
				MCL1	TCMSP
				BIRC5	TCMSP
				IL2	TCMSP
				CCNB1	TCMSP
				TYR	TCMSP
				IFNG	TCMSP
				IL4	TCMSP
				TOP2A	TCMSP
				GSTP1	TCMSP
				XIAP	TCMSP
				SLC2A4	TCMSP
				INSR	TCMSP
				CD40LG	TCMSP
				PTGES	TCMSP
				NUF2	TCMSP
				ADCY2	TCMSP
				MET	TCMSP
				LCK	Binding DB
				PTGS2	Binding DB
				XDH	Binding DB
				CYP1B1	Binding DB
				AKR1B1	Binding DB
				FLT3	Binding DB
				NOX4	Binding DB
				MMP12	Binding DB
				PSIP1	Binding DB
				TNKS2	Binding DB
				CYP1A1	Binding DB
				PIM1	Binding DB
				ALOX5	Binding DB
				MAPK10	Binding DB
				TNKS	Binding DB
				CYP1A2	Binding DB
				MMP2	Binding DB
				CDK5	Binding DB
				AURKB	Binding DB
				PARP1	Binding DB
				MAOA	Binding DB
				MMP9	Binding DB
				APP	Binding DB
				TTR	Binding DB
				GLO1	Binding DB
				CD38	Binding DB
				ABCG2	Binding DB
				MMP13	Binding DB
				SYK	Binding DB
				MMP3	Binding DB
				MAPK14	Binding DB
				AMY1A	Binding DB
				GPR35	Binding DB
				ABCB1	Binding DB
				CDK2	Binding DB
				DAPK1	Binding DB
				DPP3	Binding DB
				MAOB	Binding DB
				FASN	Binding DB
				NEU2	Binding DB
				GSK3B	Binding DB
				CA1	Binding DB
				CA2	Binding DB
				CA4	Binding DB
				CA7	Binding DB
				CA12	Binding DB
				BCHE	Binding DB
				ACHE	Binding DB
			Saffloryellow A	PTGS2	TCMSP
				DPP4	TCMSP
				PRSS1	TCMSP
			Scopoletin	CASP3	STITCH
				UGT2B15	STITCH
				MITF	STITCH
				UGT1A3	STITCH
				UGT1A1	STITCH
				UGT1A7	STITCH
				UGT1A10	STITCH
				UGT1A8	STITCH
				UGT1A6	STITCH
				UGT1A9	STITCH
				CAT	STITCH
				UGT2B7	STITCH
				UGT2B4	STITCH
				PTGS1	TCMSP
				F2	TCMSP
				NQO2	TCMSP
				PTGS2	TCMSP
				CA1	TCMSP
				ADRB2	TCMSP
				LTA4H	TCMSP
				MAOB	TCMSP
				GRIA2	TCMSP
				PRKACA	TCMSP
				SLC6A2	TCMSP
				QTRT1	TCMSP
				CA9	Binding DB
				CA12	Binding DB
				CA7	Binding DB
				CA1	Binding DB
				CA13	Binding DB
				CA2	Binding DB
				GAPDH	Binding DB
				SORD	Binding DB
				AKR1B1	Binding DB
				PTGS2	Binding DB
				ALOX5	Binding DB
				ACHE	Binding DB
			Luteolin-7-O-β-D-glucopyranoside	MTRR	STITCH
				NOS2	STITCH
				NOS3	STITCH
				HMOX1	STITCH
				POR	STITCH
				NOS1	STITCH
				PRSS1	TCMSP
				NOS2	TCMSP
				PTGS2	TCMSP
				STK33	Binding DB
				MAPK14	Binding DB
				MAPK10	Binding DB
				PTPN1	Binding DB
				ACHE	Binding DB
				TNF	Binding DB
				IL2	Binding DB
			Oxyresveratrol	PTGS1	TCMSP
				PTGS2	TCMSP
				MAOB	TCMSP
				PRKACA	TCMSP
				CYP1A1	Binding DB
				CYP1B1	Binding DB
				MMP2	Binding DB
				CYP1A2	Binding DB
				TYR	Binding DB
				PTGS1	Binding DB
				PTGS2	Binding DB
				STK33	Binding DB
			Tanshindiol C	PTGS2	TCMSP
				F2	TCMSP
				CA2	TCMSP
				ACHE	TCMSP
				DPP4	TCMSP
				HSP90AA1	TCMSP
				NCOA1	TCMSP
			Quercetin	CYP2C8	STITCH
				CYP1A1	STITCH
				CYP1B1	STITCH
				SLC2A2	STITCH
				HIBCH	STITCH
				MCL1	STITCH
				PIM1	STITCH
				ATP5B	STITCH
				HCK	STITCH
				STK17B	STITCH
				ATP5A1	STITCH
				ATP5C1	STITCH
				MMP9	STITCH
				SIRT1	STITCH
				AKT1	STITCH, TCMSP, Binding DB
				PTGS2	STITCH
				CASP3	STITCH, TCMSP
				ABCB1	STITCH, Binding DB
				CYP3A4	STITCH
				CYP1A2	STITCH
				PTGS1	TCMSP
				AR	TCMSP
				PPARG	TCMSP
				PTGS2	TCMSP
				HSP90AA1	TCMSP
				PIK3CG	TCMSP
				NCOA2	TCMSP
				DPP4	TCMSP
				AKR1B1	TCMSP, Binding DB
				PRSS1	TCMSP
				TOP2A	TCMSP
				F2	TCMSP
				KCNH2	TCMSP
				SCN5A	TCMSP
				F10	TCMSP
				ADRB2	TCMSP
				MMP3	TCMSP
				PRKACA	TCMSP
				F7	TCMSP
				NOS3	TCMSP
				RXRA	TCMSP
				ACHE	TCMSP, Binding DB
				GABRA1	TCMSP
				MAOB	TCMSP
				RELA	TCMSP
				EGFR	TCMSP
				VEGFA	TCMSP
				CCND1	TCMSP
				BCL2	TCMSP
				BCL2L1	TCMSP
				FOS	TCMSP
				CDKN1A	TCMSP
				EIF6	TCMSP
				BAX	TCMSP
				CASP9	TCMSP
				PLAU	TCMSP
				MMP2	TCMSP
				MMP9	TCMSP
				MAPK1	TCMSP
				IL10	TCMSP
				EGF	TCMSP
				RB1	TCMSP
				TNF	TCMSP
				JUN	TCMSP
				IL6	TCMSP
				AHSA1	TCMSP
				TP53	TCMSP
				ELK1	TCMSP
				NFKBIA	TCMSP
				POR	TCMSP
				ODC1	TCMSP
				XDH	TCMSP
				CASP8	TCMSP
				TOP1	TCMSP
				RAF1	TCMSP
				SOD1	TCMSP
				PRKCA	TCMSP
				MMP1	TCMSP
				HIF1A	TCMSP
				STAT1	TCMSP
				RUNX1T1	TCMSP
				HERC5	TCMSP
				HSPA5	TCMSP
				ERBB2	TCMSP
				PPARG	TCMSP
				ACACA	TCMSP
				HMOX1	TCMSP
				CYP3A4	TCMSP
				CYP1A2	TCMSP
				CAV1	TCMSP
				MYC	TCMSP
				F3	TCMSP
				GJA1	TCMSP
				CYP1A1	TCMSP
				ICAM1	TCMSP
				IL1B	TCMSP
				CCL2	TCMSP
				SELE	TCMSP
				VCAM1	TCMSP
				PTGER3	TCMSP
				CXCL8	TCMSP
				PRKCB	TCMSP
				BIRC5	TCMSP
				DUOX2	TCMSP
				NOS3	TCMSP
				HSPB1	TCMSP
				TGFB1I1	TCMSP
				SULT1E1	TCMSP
				MGAM	TCMSP
				IL2	TCMSP
				NR1I2	TCMSP
				CYP1B1	TCMSP
				CCNB1	TCMSP
				PLAT	TCMSP
				THBD	TCMSP
				SERPINE1	TCMSP
				COL1A1	TCMSP
				IFNG	TCMSP
				ALOX5	TCMSP, Binding DB
				PTEN	TCMSP
				IL1A	TCMSP
				MPO	TCMSP
				TOP2A	TCMSP
				NCF1	TCMSP
				ABCG2	TCMSP, Binding DB
				HAS2	TCMSP
				GSTP1	TCMSP
				NFE2L2	TCMSP
				NQO1	TCMSP
				PARP1	TCMSP
				AHR	TCMSP
				PSMD3	TCMSP
				SLC2A4	TCMSP
				COL3A1	TCMSP
				CXCL11	TCMSP
				CXCL2	TCMSP
				DCAF5	TCMSP
				NR1I3	TCMSP
				CHEK2	TCMSP
				INSR	TCMSP
				CLDN4	TCMSP
				PPARA	TCMSP
				PPARD	TCMSP
				HSF1	TCMSP
				CRP	TCMSP
				CXCL10	TCMSP
				CHUK	TCMSP
				SPP1	TCMSP
				RUNX2	TCMSP
				RASSF1	TCMSP
				E2F1	TCMSP
				E2F2	TCMSP
				ACPP	TCMSP
				CTSD	TCMSP
				IGFBP3	TCMSP
				IGF2	TCMSP
				CD40LG	TCMSP
				IRF1	TCMSP
				ERBB3	TCMSP
				PON1	TCMSP
				DIO1	TCMSP
				PCOLCE	TCMSP
				NPEPPS	TCMSP
				HK2	TCMSP
				NKX3-1	TCMSP
				RASA1	TCMSP
				GSTM1	TCMSP
				GSTM2	TCMSP
				CDK1	Binding DB
				CYP1B1	Binding DB
				CYP1A1	Binding DB
				CSNK2A1	Binding DB
				CA2	Binding DB
				ABCC1	Binding DB
				CA1	Binding DB
				CA7	Binding DB
				CA14	Binding DB
				CA6	Binding DB
				CA5A	Binding DB
				CA9	Binding DB
				DRD4	Binding DB
				CA4	Binding DB
				CA3	Binding DB
				CA12	Binding DB
				SLC6A2	Binding DB
				OPRK1	Binding DB
				OPRM1	Binding DB
				AVPR1B	Binding DB
				AVPR2	Binding DB
				SLC6A4	Binding DB
				HTR1A	Binding DB
				HTR1D	Binding DB
				HTR3A	Binding DB
				HTR5A	Binding DB
				HTR6	Binding DB
				HTR7	Binding DB
				ADRA1A	Binding DB
				ADRA1B	Binding DB
				ADRA2A	Binding DB
				ADRA2B	Binding DB
				ADRA2C	Binding DB
				CHRM1	Binding DB
				CHRM2	Binding DB
				CHRM3	Binding DB
				CHRM4	Binding DB
				CHRM5	Binding DB
				DRD1	Binding DB
				DRD5	Binding DB
				CA5B	Binding DB
				BACE1	Binding DB
				CYP2C9	Binding DB
				ADORA3	Binding DB
				BCHE	Binding DB
				CDK6	Binding DB
				CDK5	Binding DB
				PIK3CG	Binding DB
				AMY1A	Binding DB
				PIM1	Binding DB
				CTSL	Binding DB
				GSK3B	Binding DB
				STK33	Binding DB
				OXTR	Binding DB
				MAPK14	Binding DB
				MAPK10	Binding DB
				AURKB	Binding DB
				CYP2C8	Binding DB
				DPP3	Binding DB
				HNRNPA1	Binding DB
				PTPN1	Binding DB
				PLAU	Binding DB
				MMP1	Binding DB
				CDK4	Binding DB
				LCK	Binding DB
				F2	Binding DB
				EPHX2	Binding DB
				SORD	Binding DB
				ALOX15B	Binding DB
				XDH	Binding DB
				CAMK2B	Binding DB
				PYGL	Binding DB
				CDK2	Binding DB
				PTGS2	Binding DB
				CYP3A4	Binding DB
				CYP1A2	Binding DB
				CYP2D6	Binding DB
				CYP2C19	Binding DB
				ALOX12	Binding DB
				HSF1	Binding DB
				ALOX15	Binding DB
				GLO1	Binding DB
				CYP19A1	Binding DB
				DAPK1	Binding DB
				PLK1	Binding DB
				PREP	Binding DB
				DPP4	Binding DB
				APP	Binding DB
				SRC	Binding DB
				EGFR	Binding DB
				HIF1AN	Binding DB
				MAOA	Binding DB
				MAOB	Binding DB
				NEU2	Binding DB
				NOX4	Binding DB
				CALM1	Binding DB
				CD38	Binding DB
				GSR	Binding DB
				CTRC	Binding DB
				SYK	Binding DB
				MPO	Binding DB
				PTK2	Binding DB
				AXL	Binding DB
				NUAK1	Binding DB
				ALK	Binding DB
				PKN1	Binding DB
				NEK6	Binding DB
				NEK2	Binding DB
				MET	Binding DB
				IGF1R	Binding DB
				CXCR1	Binding DB
				CCR4	Binding DB
				FLT3	Binding DB
				PLA2G1B	Binding DB
				PIK3R1	Binding DB
				HSD17B2	Binding DB
				GPR35	Binding DB
				MMP13	Binding DB
				MMP2	Binding DB
				MMP3	Binding DB
				MMP9	Binding DB
				MMP12	Binding DB
			Tanshindiol B	PTGS2	TCMSP
				F2	TCMSP
				CA2	TCMSP
				ACHE	TCMSP
				DPP4	TCMSP
				HSP90AA1	TCMSP
				NCOA1	TCMSP
			Aloeemodin	UGT1A9	STITCH
				CASP9	STITCH
				CASP3	STITCH, TCMSP
				CASP8	STITCH
				TP53	STITCH, TCMSP
				XBP1	STITCH
				HSP90AA1	STITCH
				EIF2S1	STITCH
				PTGS1	TCMSP
				PTGS2	TCMSP
				HSP90AA1	TCMSP
				PIK3CG	TCMSP
				PRKACA	TCMSP
				NCOA2	TCMSP
				PKIA	TCMSP
				AKR1B1	TCMSP
				IGHG1	TCMSP
				CDKN1A	TCMSP
				EIF6	TCMSP
				BAX	TCMSP
				TNF	TCMSP
				TP53	TCMSP
				FASN	TCMSP
				PRKCA	TCMSP
				PRKCE	TCMSP
				PCNA	TCMSP
				MYC	TCMSP
				IL1B	TCMSP
				PRKCD	TCMSP
				CCNB1	TCMSP
				P2RY12	Binding DB
				EPHX2	Binding DB
				ALPL	Binding DB
				ALPPL2	Binding DB
				ACHE	Binding DB
				ALPI	Binding DB
			Genistein	FOXO3	STITSCH
				AKT1	STITSCH
				ESR1	STITSCH
				NOS3	STITSCH
				AR	STITSCH
				PPARG	STITSCH
				ESR2	STITSCH
				CYP19A1	STITSCH
				CFTR	STITSCH
				CYP1A1	STITSCH
				CXCR4	STITSCH
				PTK2	STITSCH
				MMP9	STITSCH
				MMP2	STITSCH
				ERBB2	STITSCH
				IL6	STITSCH
				CYP1A2	STITSCH
				CHEK2	STITSCH
				ATM	STITSCH
				CASP3	STITSCH
				PTGS1	TCMSP
				ESR1	TCMSP
				PPARG	TCMSP
				PTGS2	TCMSP
				MAPK14	TCMSP
				HSP90AA1	TCMSP
				CDK2	TCMSP
				CHEK1	TCMSP
				PRKACA	TCMSP
				PRSS1	TCMSP
				PIK3CG	TCMSP
				RELA	TCMSP
				EGFR	TCMSP
				STAT3	TCMSP
				AKT1	TCMSP
				VEGFA	TCMSP
				BCL2	TCMSP
				FOS	TCMSP
				CDKN1A	TCMSP
				BAX	TCMSP
				CASP9	TCMSP
				MMP9	TCMSP
				MAPK3	TCMSP
				MAPK1	TCMSP
				TNF	TCMSP
				JUN	TCMSP
				NOS2	TCMSP
				AHSA1	TCMSP
				CASP3	TCMSP
				TP53	TCMSP
				LDLR	TCMSP
				MDM2	TCMSP
				RASGRF2	TCMSP
				RAF1	TCMSP
				TEP1	TCMSP
				TIMP1	TCMSP
				HIF1A	TCMSP
				IGF1R	TCMSP
				STAT1	TCMSP
				ERBB2	TCMSP
				AR	TCMSP
				PPARG	TCMSP
				ICAM1	TCMSP
				IL1B	TCMSP
				CCL2	TCMSP
				SELE	TCMSP
				VCAM1	TCMSP
				FN1	TCMSP
				CXCL8	TCMSP
				SOD2	TCMSP
				BIRC5	TCMSP
				NOS3	TCMSP
				TGFB1	TCMSP
				SULT1E1	TCMSP
				CCNB1	TCMSP
				CDC25C	TCMSP
				PTEN	TCMSP
				HMGCR	TCMSP
				BTK	TCMSP
				PLK2	TCMSP
				GFAP	TCMSP
				UGT1A1	TCMSP
				CHEK2	TCMSP
				PPARA	TCMSP
				PCOLCE	TCMSP
				TGFB2	TCMSP
				ATM	TCMSP
				HPGD	TCMSP
				INS	TCMSP
				PBK	TCMSP
				BUB1	TCMSP
				CDC20	TCMSP
				AKR1B1	TCMSP
				CRYAB	TCMSP
				KLK3	TCMSP
				CDC37	TCMSP
				HDAC6	TCMSP
				MAP2K5	TCMSP
				MAPK12	TCMSP
				APOA1	TCMSP
				PLK1	TCMSP
				CCNB1IP1	TCMSP
				MDC1	TCMSP
				SAFB	TCMSP
				CFTR	TCMSP
				PML	TCMSP
				NCOR1	TCMSP
				GCK	TCMSP
				KCNJ11	TCMSP
				CYP24A1	TCMSP
				PTGER2	TCMSP
				PTGFR	TCMSP
				GLB1	TCMSP
				MSLN	TCMSP
				SYK	TCMSP
			Kaempferol	UGT1A7	STITCH
				UGT1A3	STITCH
				UGT1A9	STITCH
				CYP1B1	STITCH
				AHR	STITCH
				UGT1A8	STITCH
				CDK1	STITCH
				NR1I2	STITCH
				UGT3A1	STITCH
				RPS6KA3	STITCH
				UGT1A1	STITCH
				UGT1A10	STITCH
				CYP1A2	STITCH
				CYP1A1	STITCH
				MMP1	STITCH
				CCL2	STITCH
				HMOX1	STITCH
				JUN	STITCH
				AKT1	STITCH
				IGF1R	STITCH
				NOS2	TCMSP
				PTGS1	TCMSP
				AR	TCMSP
				PPARG	TCMSP
				PTGS2	TCMSP
				HSP90AA1	TCMSP
				PIK3CG	TCMSP
				PRKACA	TCMSP
				NCOA2	TCMSP
				DPP4	TCMSP
				PRSS1	TCMSP
				PGR	TCMSP
				F2	TCMSP
				CHRM1	TCMSP
				NOS3	TCMSP
				GABRA2	TCMSP
				ACHE	TCMSP
				SLC6A2	TCMSP
				CHRM2	TCMSP
				ADRA1B	TCMSP
				GABRA1	TCMSP
				TOP2A	TCMSP
				F7	TCMSP
				CALM1	TCMSP
				RELA	TCMSP
				IKBKB	TCMSP
				AKT1	TCMSP
				BCL2	TCMSP
				BAX	TCMSP
				TNF	TCMSP
				JUN	TCMSP
				AHSA1	TCMSP
				CASP3	TCMSP
				MAPK8	TCMSP
				XDH	TCMSP
				MMP1	TCMSP
				STAT1	TCMSP
				PPARG	TCMSP
				HMOX1	TCMSP
				CYP3A4	TCMSP
				CYP1A2	TCMSP
				CYP1A1	TCMSP
				ICAM1	TCMSP
				SELE	TCMSP
				VCAM1	TCMSP
				NR1I2	TCMSP
				CYP1B1	TCMSP
				ALOX5	TCMSP
				HAS2	TCMSP
				GSTP1	TCMSP
				AHR	TCMSP
				PSMD3	TCMSP
				SLC2A4	TCMSP
				NR1I3	TCMSP
				INSR	TCMSP
				DIO1	TCMSP
				PPP3CA	TCMSP
				GSTM1	TCMSP
				GSTM2	TCMSP
				AKR1C3	TCMSP
				SLPI	TCMSP
				CA7	Binding DB
				CYP1B1	Binding DB
				CA12	Binding DB
				CYP1A1	Binding DB
				ABCC1	Binding DB
				CYP2C9	Binding DB
				CA2	Binding DB
				CA4	Binding DB
				CA1	Binding DB
				BCHE	Binding DB
				ACHE	Binding DB
				CDK6	Binding DB
				CDK5	Binding DB
				AMY1A	Binding DB
				PIM1	Binding DB
				GSK3B	Binding DB
				CTDSP1	Binding DB
				MAPK14	Binding DB
				MAPK10	Binding DB
				AURKB	Binding DB
				DPP3	Binding DB
				MMP1	Binding DB
				PTGS1	Binding DB
				EGFR	Binding DB
				ABCG2	Binding DB
				PTGS2	Binding DB
				ALOX5	Binding DB
				GLO1	Binding DB
				DAPK1	Binding DB
				PREP	Binding DB
				DPP4	Binding DB
				APP	Binding DB
				TYR	Binding DB
				AR	Binding DB
				NEU2	Binding DB
				CYP1A2	Binding DB
				NOX4	Binding DB
				XIAP	Binding DB
				AKR1B1	Binding DB
				AHR	Binding DB
				ESRRA	Binding DB
				ABCB1	Binding DB
				FLT3	Binding DB
				HSD17B1	Binding DB
				HSD17B2	Binding DB
				XDH	Binding DB
			Palbinone	PGR	TCMSP
				NR3C2	TCMSP
			Farrerol	PTGS2	TCMSP
				F2	TCMSP
				CA2	TCMSP
				ACHE	TCMSP
				DPP4	TCMSP
				HSP90AA1	TCMSP
				NCOA1	TCMSP
			Danshenxinkun A	PTGS1	TCMSP
				ESR1	TCMSP
				AR	TCMSP
				SCN5A	TCMSP
				PPARG	TCMSP
				F10	TCMSP
				PTGS2	TCMSP
				HSP90AA1	TCMSP
				LACTB	TCMSP
				IGHG1	TCMSP
				NCOA2	TCMSP
				NCOA1	TCMSP
				CALM1	TCMSP
			E-butylidenephthalide	PTGS1	TCMSP
				CHRM3	TCMSP
				CHRM1	TCMSP
				ADRB1	TCMSP
				SCN5A	TCMSP
				PTGS2	TCMSP
				ADRA2A	TCMSP
				ADRA2C	TCMSP
				PDE3A	TCMSP
				SLC6A2	TCMSP
				CHRM2	TCMSP
				ADRA2B	TCMSP
				ADRA1B	TCMSP
				SLC6A3	TCMSP
				ADRB2	TCMSP
				SLC6A4	TCMSP
				GABRA1	TCMSP
				MAOB	TCMSP
				MAOA	TCMSP
				PRKACA	TCMSP
				HTR7	Binding DB
				TRPA1	Binding DB
			Dihydrotanshinone I	PTGS1	TCMSP
				SCN5A	TCMSP
				PTGS2	TCMSP
				HTR3A	TCMSP
				RXRA	TCMSP
				ADRA1A	TCMSP
				ADRA1B	TCMSP
				ADRB2	TCMSP
				GABRA1	TCMSP
				HSP90AA1	TCMSP
				PIK3CG	TCMSP
				CHRNA7	TCMSP
				PRKACA	TCMSP
				IGHG1	TCMSP
				NCOA2	TCMSP
				NCOA1	TCMSP
				CALM1	TCMSP
				CES2	Binding DB
				CES1	Binding DB
				ACHE	Binding DB
			Furanodiene	CHRM3	TCMSP
				F2	TCMSP
				CHRM1	TCMSP
				PTGS2	TCMSP
				NOS3	TCMSP
				SLC6A3	TCMSP
				ADRB2	TCMSP
				SLC6A4	TCMSP
				DPP4	TCMSP
			Tanshinone I	TMPRSS11D	STITCH
				CASP3	STITCH
				NOS3	STITCH
				CCND1	STITCH
				NR1I2	STITCH
				CYP1A2	STITCH
				CYP2C19	STITCH
				F2	TCMSP
				AR	TCMSP
				PTGS2	TCMSP
				RXRA	TCMSP
				DPP4	TCMSP
				HSP90AA1	TCMSP
				PIK3CG	TCMSP
				PRSS1	TCMSP
				NCOA1	TCMSP
				VEGFA	TCMSP
				ICAM1	TCMSP
				VCAM1	TCMSP
				CES2	Binding DB
				CES1	Binding DB
				ACHE	Binding DB
				PTPN6	Binding DB
				PTPN11	Binding DB
				RAD51	Binding DB
			Cyclomulberrin	F10	TCMSP
				PTGS2	TCMSP
				KDR	TCMSP
				TOP2A	TCMSP
				PRSS1	TCMSP
				NCOA2	TCMSP
			Miltirone	CYP2C19	STITCH
				CES2	STITCH, Binding DB
				PTGS1	TCMSP
				DRD1	TCMSP
				CHRM3	TCMSP
				CHRM1	TCMSP
				ESR1	TCMSP
				AR	TCMSP
				DRD5	TCMSP
				SCN5A	TCMSP
				CHRM5	TCMSP
				PTGS2	TCMSP
				NOS3	TCMSP
				CA2	TCMSP
				ADRA2C	TCMSP
				CHRM4	TCMSP
				RXRA	TCMSP
				OPRD1	TCMSP
				ADRA1A	TCMSP
				CHRM2	TCMSP
				ADRA1B	TCMSP
				SLC6A3	TCMSP
				ADRB2	TCMSP
				ADRA1D	TCMSP
				TOP2A	TCMSP
				OPRM1	TCMSP
				CHRNA7	TCMSP
				NCOA2	TCMSP
				CES1	Binding DB
				ACHE	Binding DB
			1,2-Dihydrotashinone	PTGS1	TCMSP
				DRD1	TCMSP
				CHRM3	TCMSP
				F2	TCMSP
				CHRM1	TCMSP
				ESR1	TCMSP
				AR	TCMSP
				SCN5A	TCMSP
				PPARG	TCMSP
				CHRM5	TCMSP
				PTGS2	TCMSP
				NOS3	TCMSP
				HTR3A	TCMSP
				CA2	TCMSP
				RXRA	TCMSP
				OPRD1	TCMSP
				ACHE	TCMSP
				HTR2A	TCMSP
				ADRA1A	TCMSP
				ADRB2	TCMSP
				ADRA1D	TCMSP
				SLC6A4	TCMSP
				OPRM1	TCMSP
				GABRA1	TCMSP
				HSP90AA1	TCMSP
				PIK3CG	TCMSP
				CHRNA7	TCMSP
				PRKACA	TCMSP
				IGHG1	TCMSP
				PRSS1	TCMSP
				NCOA1	TCMSP
			Methyl gallate	PTGS1	TCMSP
				PTGS2	TCMSP
				ADRA2A	TCMSP
				MAOB	TCMSP
				GRIA2	TCMSP
				FUT7	Binding DB
				XDH	Binding DB
				TRAV4	Binding DB
			Taxifolin	PTGS1	TCMSP
				PTGS2	TCMSP
				HSP90AA1	TCMSP
				PIK3CG	TCMSP
				RXRA	TCMSP
				AKR1B1	TCMSP
				RELA	TCMSP
				ICAM1	TCMSP
				DGAT2	TCMSP
				MTTP	TCMSP
				APOB	TCMSP
			Morin	NR0B2	STITCH
				ABCB11	STITCH
				ABCC1	STITCH
				ABCB1	STITCH, TCMSP, HIT
				HMOX1	STITCH
				CASP7	STITCH
				CASP3	STITCH
				CASP9	STITCH
				UGT1A7	STITCH
				UGT1A8	STITCH
				RNMT	STITCH
				UGT1A10	STITCH
				UGT1A9	STITCH
				MOGS	STITCH
				UGT1A1	STITCH
				PTGS1	TCMSP
				AR	TCMSP
				PPARG	TCMSP
				PTGS2	TCMSP
				DPP4	TCMSP
				HSP90AA1	TCMSP
				PIK3CG	TCMSP
				XDH	TCMSP
				TOP1	TCMSP
				EDN1	TCMSP
				ALOX5	TCMSP
				CD36	TCMSP
				DIO1	TCMSP
				GSR	TCMSP
				PIP4K2A	TCMSP
				BATF3	TCMSP
			Apigenin	MAOA	STITCH
				CDK1	STITCH
				CASP3	STITCH
				PTGS2	STITCH
				TP53	STITCH
				AKT1	STITCH
				ESR1	STITCH
[truncated: 171 more rows]
